# Supplementary material for: Cross-sectional study of the relationship between women’s representation among editors and peer reviewers in journals of the British Medical Journal Publishing Group
Source: PubMed Central journal article supplement — BMJ Open. 2022 May 11;12(5):e061054. doi: 10.1136/bmjopen-2022-061054 (PMC9109081; doi:10.1136/bmjopen-2022-061054), 2022-05-11
Supplement: bmjopen-2022-061054.draft_revisions.pdf [file bmjopen-2022-061054.draft_revisions.pdf]

# BMJ Open

BMJ Open is committed to open peer review. As part of this commitment we make the peer review history of every article we publish publicly available.

When an article is published we post the peer reviewers' comments and the authors' responses online. We also post the versions of the paper that were used during peer review. These are the versions that the peer review comments apply to.

The versions of the paper that follow are the versions that were submitted during the peer review process. They are not the versions of record or the final published versions. They should not be cited or distributed as the published version of this manuscript.

BMJ Open is an open access journal and the full, final, typeset and author-corrected version of record of the manuscript is available on our site with no access controls, subscription charges or pay-per-view fees (<http://bmjopen.bmj.com>).

If you have any questions on BMJ Open's open peer review process please email [info.bmjopen@bmj.com](mailto:info.bmjopen@bmj.com)

# BMJ Open

## Women's representation among peer reviewers of medical journals: a study of the British Medical Journal Publishing Group

|                               |                                                                                                                                                                                                                                                                          |
|-------------------------------|--------------------------------------------------------------------------------------------------------------------------------------------------------------------------------------------------------------------------------------------------------------------------|
| Journal:                      | <i>BMJ Open</i>                                                                                                                                                                                                                                                          |
| Manuscript ID                 | bmjopen-2022-061054                                                                                                                                                                                                                                                      |
| Article Type:                 | Original research                                                                                                                                                                                                                                                        |
| Date Submitted by the Author: | 14-Jan-2022                                                                                                                                                                                                                                                              |
| Complete List of Authors:     | Pinho-Gomes, Ana-Catarina; Imperial College London; King's College London<br>Vassallo, Amy; The George Institute for Global Health<br>Woodward, Mark; The George Institute for Global Health, Professorial Unit<br>Peters, Sanne; The George Institute for Global Health |
| Keywords:                     | GENERAL MEDICINE (see Internal Medicine), MEDICAL ETHICS, MEDICAL EDUCATION & TRAINING                                                                                                                                                                                   |
|                               |                                                                                                                                                                                                                                                                          |

SCHOLARONE™  
Manuscripts

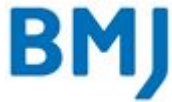

I, the Submitting Author has the right to grant and does grant on behalf of all authors of the Work (as defined in the below author licence), an exclusive licence and/or a non-exclusive licence for contributions from authors who are: i) UK Crown employees; ii) where BMJ has agreed a CC-BY licence shall apply, and/or iii) in accordance with the terms applicable for US Federal Government officers or employees acting as part of their official duties; on a worldwide, perpetual, irrevocable, royalty-free basis to BMJ Publishing Group Ltd ("BMJ") its licensees and where the relevant Journal is co-owned by BMJ to the co-owners of the Journal, to publish the Work in this journal and any other BMJ products and to exploit all rights, as set out in our [licence](#).

The Submitting Author accepts and understands that any supply made under these terms is made by BMJ to the Submitting Author unless you are acting as an employee on behalf of your employer or a postgraduate student of an affiliated institution which is paying any applicable article publishing charge ("APC") for Open Access articles. Where the Submitting Author wishes to make the Work available on an Open Access basis (and intends to pay the relevant APC), the terms of reuse of such Open Access shall be governed by a Creative Commons licence – details of these licences and which [Creative Commons](#) licence will apply to this Work are set out in our licence referred to above.

Other than as permitted in any relevant BMJ Author's Self Archiving Policies, I confirm this Work has not been accepted for publication elsewhere, is not being considered for publication elsewhere and does not duplicate material already published. I confirm all authors consent to publication of this Work and authorise the granting of this licence.

1  
2  
3 **Women's representation among peer reviewers of medical journals: a study of the British**  
4 **Medical Journal Publishing Group**  
5  
6  
7  
8  
9

10 Ana-Catarina Pinho-Gomes, DPhil<sup>1,2</sup>, Amy Vassallo, PhD<sup>3</sup>, Mark Woodward, PhD<sup>1,3</sup>, Sanne A.E. Peters,  
11 PhD<sup>1,3,4</sup>  
12  
13  
14  
15  
16

17 <sup>1</sup>The George Institute for Global Health, School of Public Health, Imperial College London, London,  
18 UK  
19

20 <sup>2</sup>School of Population Health & Environmental Sciences, Faculty of Life Sciences & Medicine, King's  
21 College London, London, UK  
22

23 <sup>3</sup>The George Institute for Global Health, University of New South Wales, Sydney, New South Wales,  
24 Australia  
25

26 <sup>4</sup>Julius Center for Health Sciences and Primary Care, University Medical Center Utrecht, Utrecht  
27 University, Utrecht, The Netherlands  
28  
29  
30  
31  
32  
33

34 **Word count 3,184**  
35  
36  
37  
38  
39  
40  
41  
42  
43  
44  
45

46 **Corresponding author:**

47 Ana-Catarina Pinho-Gomes

48 The George Institute for Global Health, Imperial College London

49 Email: a.pinho-gomes@imperial.ac.uk  
50  
51  
52  
53  
54  
55  
56  
57  
58  
59  
60

## Abstract

**Objectives:** To investigate whether there is an association between women's representation as peer reviewers and editors of medical journals.

**Methods:** In this cross-sectional study, the gender of editors and peer reviewers of journals of the British Medical Journals Publishing Group (BMJ-PG) in 2020 was determined based on given names. Trends over time were analysed for the BMJ between 2009 and 2017.

**Results:** Overall, this study included 47 of the 74 journals in the BMJ-PG. Women accounted for 30.2% of the 42,539 peer reviewers, with marked variation from 8 to 50%. Women represented 33.4% of the 555 editors, including 19.2% of the 52 editors-in-chief. There was a moderate positive correlation between the percentage of women as editors and as reviewers (Spearman correlation coefficient 0.590;  $p < 0.0001$ ). The percentage of women as editors, excluding editors-in-chief, was higher when the editor-in-chief was a woman than a man (53.3% versus 29.2%, respectively;  $p < 0.0001$ ). Likewise, the percentage of women as peer reviewers was higher in journals that had a woman as editor-in-chief in comparison with a man (32.0% versus 26.4%, respectively;  $p < 0.0001$ ). There was a slight increase in the percentage of women as peer reviewers from 27.3% in 2009 to 29.7% in 2017 in the BMJ.

**Conclusions:** Women account for less than one in three peer reviewers of medical journals. Women's representation as peer reviewers is higher in journals with higher percentage of women as editors or with a woman as editor-in-chief. It is, thus, imperative to address the persisting gender gap at all levels of the publishing system.

## Article summary

### Strengths and limitations

- This study included journals from a large and renowned family of journals, which enable including over 40,000 peer reviewers and 500 editors.
- Gender identification based on pronouns for editors enabled considering non-binary gender, even if no their/theirs pronouns were used.
- By relying on a binary assignment of gender based on given names for reviewers, this study failed to account for non-binary gender or gender identities that did not match that of the given name.
- This study used journals from a single publishing family, which might not be representative of all medical journals.
- It is impossible to ascertain whether the observed correlation between women's representation among editors and peer reviewers is causal.

## Introduction

Women's underrepresentation in the publishing system, including in medicine, is well-established, with stark gender inequalities among authors of scientific papers, particularly at senior levels.<sup>1 2</sup>

Overall, women account for 20 to 40% of first authors and for 15 to 30% of last authors.<sup>3-5</sup> Women are also underrepresented among editors-in-chief of medical journals and more widely in scientific editorial boards.<sup>6 7</sup>

Peer reviewers play a pivotal role in the publishing process and exert a strong influence on what research eventually gets published and in what calibre of journal. Peer reviewers also have an important role in ensuring scientific publications adhere to reporting standards and guidelines, particularly those for the incorporation of sex and gender analyses.<sup>8</sup> Since women as authors are more likely to report sex- and gender-disaggregated analyses, women as peer reviewers may also be more likely than men to ensure that sex and gender are adequately handled in medical papers.<sup>9</sup> Gender inequality among peer reviewers may, thus, have detrimental consequences for progress in medical knowledge and, ultimately, population health. However, the inclusion of women as peer reviewers of medical journals has received less attention, probably due to the lack of detailed publicly available data on peer reviewers.

In addition, although women's representation among journal editors has been positively associated with women's representation among authors, this association remains poorly understood for peer reviewers, particularly in medical journals.<sup>10</sup> Indeed, the choice of peer reviewers is influenced by myriad factors, and hence it is uncertain to what extent gender influences editors' decisions, either consciously or unconsciously.<sup>11</sup> Therefore, this study aimed to determine women's representation among peer reviewers and editors of medical journals, and investigate whether greater women's representation among editors correlated with greater representation as peer reviewers.

## Methods

### Data sources and definitions

Among the major families of journals, only the British Medical Journal (BMJ) Publishing Group (BMJ-PG) requires their journals to report annually a list of their contributing peer reviewers.<sup>12</sup> The BMJ-PG is a large family of journals, which covers most medical specialties, as well as other fields of research related to health services (e.g., quality improvement and safety). As data for peer reviewers were not publicly available for other publishers, or families of medical journals, they were not eligible for this study. We conducted a systematic search on Google for the list of peer reviewers for each of the journals in the BMJ-PG in 2020. Given names were extracted for all peer reviewers. For all journals of the BMJ-PG, apart the BMJ, data were available only for 2020, and we used those data to investigate current representation of women in the BMJ-PG overall.

In addition, we investigated trends over time in women's representation using data available for peer reviewers in the BMJ for 2009, 2010, and 2013 to 2017. Data were not available for the BMJ after 2017. For comparison, the list of peer reviewers in 2010, 2012, 2014, 2016, 2018, and 2020 for two leading medical journals (The New England Journal of Medicine (NEJM) and Journal of the American Medical Association (JAMA)) were also reviewed and given names of reviewers extracted. These two journals were not included in the analysis of BMJ-PG journals.

We used the "genderizeR" package for R to predict the gender of the peer reviewers based on their given names. This software collects data from the Internet and includes 38,659 given names from 242 countries across the globe.<sup>13</sup> A two-step approach was used to determine gender based on given names.<sup>14</sup> First, given names were extracted from full names using a specific feature of the GenderizeR package. Second, the gender of the vector of given names was classified as either woman or man using another feature of the package. When given names could not be recognised and extracted from full names by the software, those reviewers were considered as "missing" and excluded from all analyses.

For each journal, data for editor-in-chief, deputy editors, assistant editors and associate editors were extracted. These are defined as "editors" throughout the manuscript. Their gender was determined based on pronouns and photographs available on the journal website or professional affiliations. Other members of editorial boards (e.g., advisory editors, statistical advisors, emeritus editors) were excluded.

Data on the impact factor and Citescore for 2020 were extracted from the journal website. CiteScore is a measure reflecting the yearly average number of citations of articles published in that journal.



1  
2  
3 This metric was launched in December 2016 by Elsevier as an alternative to the generally used  
4 impact factors calculated by Clarivate Analytics and published in the Journal Citation Reports.  
5 CiteScore is based on the citations recorded in the Scopus database rather than in Journal Citation  
6 Reports, and those citations are collected for articles published in the preceding four years instead  
7 of two or five. We used these two metrics to assess impact because impact factor was not available  
8 for 21 journals, of which 15 had a Citescore available.  
9  
10  
11  
12  
13  
14

#### 15 Data analysis

16 We computed the percentage of women among peer reviewers and editors overall and for each  
17 journal. We plotted the association between the percentage of women as peer reviewers and  
18 editors, stratified by gender of the editor-in-chief. We computed the Spearman correlation  
19 coefficients between the percentage of women as editors and the percentage of women as peer  
20 reviewers and between the percentage of women as peer reviewers and the journal impact factor  
21 and Citescore. We compared the percentage of women among peer reviewers and editors according  
22 to the gender of the editor-in-chief using Fisher's exact test. All data analyses used R version 4.0.2 (R  
23 Core Team, 2020).  
24  
25  
26  
27  
28  
29  
30

#### 31 Patient and Public Involvement

32 Patients and the public were not involved in this study.  
33  
34  
35  
36  
37  
38  
39  
40  
41  
42  
43  
44  
45  
46  
47  
48  
49  
50  
51  
52  
53  
54  
55  
56  
57  
58  
59  
60

## Results

The BMJ-PG publishes 74 journals, of which 47 were included in the analysis because reviewers' names were not available for 27 journals (**Table S1**).

### Women as peer reviewers

Overall, women accounted for 30.2% of the 42,539 peer reviewers in 2020 (**Table 1**). There was marked variation in women's representation across journals (median 31.3%, interquartile range 24.5% to 38.5%), ranging from 8% for *The Journal of the International Society of Arthroscopy, Knee Surgery and Orthopaedic Sports Medicine* to 50% in *Medical Humanities*. No journal had more than 50% women reviewers. Women's representation among peer reviewers in the BMJ-PG was higher than in the *JAMA* (28.1%) and the *NEJM* (18.9%).

### Women as editors

Overall, women represented 33.4% of the 555 editors, including 19.2% of the 52 editors-in-chief in 2020 (**Table 1**). There were five journals with more than one editor-in-chief, all of which had two men as editors-in-chief. There were five journals with no woman among their editors and twelve journals in which women's representation was equal or above 50% (**Table 1**). Among those twelve journals, seven had a woman as editor-in-chief. The highest women's representation was 88% in *BMJ Open Quality*.

### Association between women as editors and peer reviewers

There was a moderate positive correlation between the percentage of women as editors and as reviewers (Spearman correlation coefficient 0.590;  $p < 0.0001$ ) (**Figure 1**). The percentage of women as editors, excluding editors-in-chief, was higher when the editor-in-chief was a woman than a man (53.3% versus 29.2%, respectively;  $p < 0.0001$ ). Likewise, the percentage of women as peer reviewers was higher in journals that had a woman as editor-in-chief in comparison with a man (32.0% versus 26.4%, respectively;  $p < 0.0001$ ).

### Trends over time and by impact metrics

The percentage of women as peer reviewers increased slightly from 27.3% in 2010 to 29.7% in 2017 in the BMJ, from 23.9% in 2010 to 28.1% in 2020 in *JAMA*, and from 16.9% in 2010 to 18.9% in 2020 in the *NEJM* (**Figure 2 and Table S2**). The impact factor of the journals varied between 1.7 for the *European Journal of Hospital Pharmacy* and 38.8 for the *BMJ*, and the Citescore ranged from 1 for *BMJ Leader* to 35.6 for *Gut* (**Table 1**). There was a non-significant negative correlation between the

1  
2  
3 impact of the journal and the percentage of women as peer reviewers (**Figure S1**). The Spearman  
4 correlation coefficient was -0.288 ( $p=0.068$ ), when using Citescore, and -0.343 ( $p=0.087$ ), when using  
5 impact factor. There was a modest negative correlation between the impact of the journal and the  
6 percentage of women as editors when using Citescore (Spearman correlation coefficient -0.310,  
7  $p=0.049$ ), but not when using impact factor (Spearman correlation coefficient -0.152,  $p=0.459$ ).  
8  
9  
10  
11  
12  
13  
14  
15  
16  
17  
18  
19  
20  
21  
22  
23  
24  
25  
26  
27  
28  
29  
30  
31  
32  
33  
34  
35  
36  
37  
38  
39  
40  
41  
42  
43  
44  
45  
46  
47  
48  
49  
50  
51  
52  
53  
54  
55  
56  
57  
58  
59  
60

For peer review only

## Discussion

In this study of women's representation among peer reviewers of medical journals in the BMJ-PG, women accounted for 30% of peer reviewers in 2020, with variation from 8% to 50 and no evidence of a meaningful change between 2009 and 2017 in the BMJ. Women were also underrepresented among editors, where they accounted for 33% of the editors and 19% of editors-in-chief. Twelve journals (25%) had 50% or more women editors, and five journals had no women authors. Women's representation among peer reviewers was higher in journals with a higher representation of women as editors, or with a woman as editor-in-chief, as well as in journals with lower impact factor.

Our finding that women account for less than one in three peer reviewers is in keeping with previous studies, which used different methods and samples of journals. In the Frontiers family of journals, women accounted for only 28% of 43,000 peer reviewers between 2007 and 2015.<sup>15</sup> More recently, women were found to represent 21% of 740,000 peer reviewers across 145 journals in various fields of research, including physical, biomedical and social sciences.<sup>16</sup> Women's representation as peer reviewers was 25% in journals related to biomedicine and health, 21% in life sciences, 16% in physical sciences, and 38% in social sciences and humanities. Although the latter study had access to privileged information provided by publishers, it was based on a sample of journals selected by the publishers, which may not have been a random sample. Notwithstanding the limitations of ascertaining gender based on given names, the consistency of our findings with those of different publishers and journal families supports the validity of the conclusion that women are underrepresented as peer reviewers. The underlying reasons for women's underrepresentation as peer reviewers of medical journals are likely manifold. First, bias, even if unconscious, may influence editors' decision to invite a man rather than a woman to peer review a manuscript. Our findings that men are disproportionately represented as editors, and that this is associated with a lower representation of women as peer reviewers in comparison to men, support the possibility of such gender affinity bias. Indeed, a previous study demonstrated editors have substantial same-gender preference when selecting peer reviewers irrespective of whether they are women or men.<sup>17</sup> Likewise, having women as editors-in-chief has been associated with increased representation of women in peer review.<sup>18</sup> Second, considering that peer reviewers are usually senior researchers or leaders in their fields,<sup>18</sup> the longstanding under-representation of women in senior academic roles may leave editors with seemingly little choice but to invite men to peer review manuscripts.<sup>19</sup> This is supported by our finding that women's representation as peer reviewers was lower in journals with higher impact factor, which are more likely to acquire peer reviewers who are leading experts in their field. Third, it is possible women face barriers that prevent them from accepting invitations to

1  
2  
3 take part in the peer review process due to competing demands. Deeply entrenched gendered roles  
4 in our contemporary societies mean women still bear the brunt of homemaking, childcare, other  
5 unpaid care roles.<sup>20 21</sup> Furthermore, women undertake a greater share of internal service in  
6 academic institutions (e.g., activities related to faculty governance, faculty recruitment, evaluation  
7 and promotion, student admissions and scholarships, programme supervision, development and  
8 marketing, internal awards) in comparison to men.<sup>22</sup> Taken together, these unpaid commitments  
9 reduce women's availability to engage with scholarly activities with unscheduled and tight deadlines,  
10 such as peer review. Although a recent study showed a minimal difference between women and  
11 men's acceptance of peer review invitations (37% for women versus 41% for men), there was a  
12 significant decline during the COVID-19 pandemic in acceptance rates for women, but not for men,  
13 in health and medicine journals.<sup>23</sup> This strengthens the argument that the greater burden of caring  
14 and family responsibilities posed on women, which was exacerbated during the pandemic, may  
15 jeopardise women's ability to engage with peer review.

16  
17  
18 The findings of this study have important implications. The wider benefits of gender equality for  
19 science and medicine have been compellingly demonstrated for men as well as women.<sup>24 25</sup> Indeed, a  
20 research community that is more inclusive, diverse, and representative, and works to ensure that  
21 everyone counts, is more likely to generate research that is universally beneficial and not limited by  
22 inequalities.<sup>26</sup> Peer reviewers share with editors the role of gatekeepers of science and evidence.  
23 Besides scrutinising and evaluating the quality and integrity of manuscripts, they often influence the  
24 content. Ultimately, peer reviewers support editors in determining whether manuscripts are  
25 published or not and in which class of journal. Therefore, disproportionate representation of men  
26 among peer reviewers and editors could have deleterious consequences on the research that is  
27 published as well as its reach and impact on the scientific community and general public. Lack of  
28 gender diversity means evidence published in the highest impact journals might be swayed in favour  
29 of topics, or methods that are preferred by men and framed from their point of view, thus failing to  
30 account for the important perspective and priorities of women. On the other hand, women's under-  
31 representation as peer reviewers may be both a symptom and a cause of broader under-  
32 representation in senior positions in academia and journals as taking part in the peer review process  
33 can be a career milestone and a stepping stone to leadership roles.<sup>27 28</sup>

34  
35  
36 Although it is unclear how to resolve the longstanding gender gap in the publishing system,  
37 particularly in medical sciences, taking small yet steady steps in the right direction and monitoring  
38 their effects is a positive approach.<sup>20</sup> First, editors should be mindful of the inherent properties of  
39  
40  
41  
42  
43  
44  
45  
46  
47  
48  
49  
50  
51  
52  
53  
54  
55  
56  
57  
58  
59  
60

1  
2  
3 software tools available to help them find suitable peer reviewers.<sup>29</sup> Those tools draw on databases  
4 of authors and use matching algorithms, which means they are inherently bound to replicate or  
5 expand the gender gap in authorship. For instance, Reviewer Finder is a matching algorithm that  
6 returns researchers who have a publishing profile similar to that of the manuscript author(s).<sup>30</sup> As  
7 men are disproportionately represented among authors of papers across many scientific fields,  
8 matching is likely to lead to similar gender gaps in potential peer reviewers, unless algorithms are  
9 pre-set to suggest a gender balanced pool of peer reviewers. Second, publishers should ensure they  
10 have clear policies promoting gender equality (e.g., gender quotas) in their editorial boards. Men  
11 appear, in general, less aware of gender bias in academia than women, yet hold the majority of  
12 leadership positions in publishing which may exacerbate unrecognised biases if clear policies are not  
13 in place.<sup>31 32</sup> However, evidence from a researcher-led journal suggests improving women's  
14 representation (e.g., by gender quotas) may not be enough to stem deep-rooted gender bias  
15 observed along the editorial process.<sup>33</sup> For instance, senior editors and authors were more likely to  
16 select men than women as reviewing editors, even after correcting for the gender imbalance in the  
17 pool of reviewing editors available.<sup>33</sup> Third, publishers should provide training to editors and other  
18 editorial staff on diversity and unconscious gender bias to counteract its effects. Although equality  
19 and diversity training is no magic wand to address longstanding gender inequalities,<sup>34</sup> it may have  
20 benefits on cognitive, behavioural and attitudinal/affective learning, especially when complemented  
21 by other initiatives targeted to both awareness and skills development, and conducted over a  
22 significant period of time.<sup>35</sup> Fourth, to improve transparency and accountability, publishers should  
23 consider adopting open peer review (i.e., publishing the names of the reviewers and the content of  
24 the review with the article) or making the names of their peer reviewers publicly available, for  
25 instance as an overall acknowledgement not linked to specific contributions. However, this is not a  
26 silver bullet to fix gender inequalities. Even in journals with open peer review as standard policy,  
27 women represented only 28% of peer reviewers.<sup>17</sup> In addition, open peer review, if not properly  
28 implemented, may exacerbate inequities. Scientists, especially women, have witnessed a sharp rise  
29 in harassment, abuse (e.g., threatening e-mails, calls and comments on social media) and attacks on  
30 credibility during the COVID-19 pandemic.<sup>36</sup> Open peer review could fuel this further by publicly  
31 exposing reviewers names and the content of their appraisals. Concerns about deleterious  
32 professional and personal consequences of open peer review may discourage women to engage  
33 with the process. This, in turn, may result in increased difficulty in finding peer reviewers, and hence  
34 strategies will need to be implemented to limit the risk to researchers who reveal their identity  
35 during a critical peer review.<sup>37</sup> Finally, all of us have a key role to play in promoting gender equality  
36  
37  
38  
39  
40  
41  
42  
43  
44  
45  
46  
47  
48  
49  
50  
51  
52  
53  
54  
55  
56  
57  
58  
59  
60

1  
2  
3 within our teams, working groups, institutions, by exposing unfair gender gaps and addressing overt  
4 or concealed gender discrimination and bias.<sup>38</sup>  
5  
6  
7

### 8 Limitations

9  
10 This study has some limitations to acknowledge. First, we used a binary definition of gender of peer  
11 reviewers, which relied on predicting and assigning gender based on given names. Therefore, we did  
12 not account for non-binary gender or gender identities that did not match that of the given name  
13 and acknowledge that this method does not reflect the true diversity of the medical research  
14 community. Pronouns were used to determine gender of editors, and no they/them pronouns were  
15 present. However, it is still possible that non-binary gender identification was not reflected by the  
16 pronouns used on public websites. Ideally, future research should aim to investigate gender gaps  
17 based on self-identified gender, as has been done elsewhere.<sup>39</sup> Second, the genderizeR package  
18 could not assign a gender to all peer reviewers because the given name could not be classified as  
19 belonging to a woman or a man. However, we adopted a two-step approach to maximise the  
20 efficiency of the package, and hence the minimal percentage (<1%) of missing data is unlikely to  
21 have had a material impact on our key findings.<sup>14</sup> Third, we used journals from a single publishing  
22 family, which might not be representative of all medical journals. Results for two leading journals  
23 from different publishers, together with previous reports from other journal families suggest our  
24 findings might overestimate women's representation among peer reviewers of medical journals.<sup>15 16</sup>  
25 Fourth, it is possible our findings were affected by the COVID-19 pandemic. However, trends over  
26 time investigated for the BMJ suggested women's under-representation is a longstanding issue.  
27 Fifth, we cannot ascertain whether the observed correlation between women's representation  
28 among editors and peer reviewers is causal. Sixth, we could not estimate how many manuscripts  
29 were reviewed by each individual, and it is uncertain whether this would have swayed the gender  
30 distribution in favour of women or men.  
31  
32  
33  
34  
35  
36  
37  
38  
39  
40  
41  
42  
43  
44  
45  
46

### 47 **Conclusions**

48 Women account for less than one in three peer reviewers in BMJ-PG journals with no evidence of  
49 improvement between 2009 and 2017 in the BMJ. No journal had more than 50% women reviewers.  
50 Better representation of women as editors was correlated with representation as peer reviewers.  
51 Therefore, promoting gender equality among editors may improve women's representation as peer  
52 reviewers, which is one among many necessary steps in the pursuit of equity in editorial and  
53 publishing systems.  
54  
55  
56  
57  
58  
59  
60

**Ethics approval**

This study was based on publicly available data and hence ethical approval was not required.

**Transparency declaration**

ACPG affirms that the manuscript is an honest, accurate, and transparent account of the study being reported; that no important aspects of the study have been omitted; and that any discrepancies from the study as originally planned have been explained.

**Role of the funding source**

This study was not funded.

**Contributorship statement**

ACPG, SP, AV and MW designed this study. ACPG extracted and analysed the data and drafted the manuscript. All authors interpreted the findings and reviewed the manuscript.

**Competing interests**

MW is a consultant for Amgen, Kyowa Kirin and Freeline. No other competing interests to report.

**Funding**

This study was not funded.

**Data sharing statement**

All data are available upon request from the corresponding author.



## References

1. Lundine J, Bourgeault IL, Clark J, et al. The gendered system of academic publishing. *The Lancet* 2018;391(10132):1754-56. doi: 10.1016/S0140-6736(18)30950-4
2. Shen YA, Webster JM, Shoda Y, et al. Persistent Underrepresentation of Women's Science in High Profile Journals. *bioRxiv* 2018:275362. doi: 10.1101/275362
3. Hart KL, Perlis RH. Trends in Proportion of Women as Authors of Medical Journal Articles, 2008-2018. *JAMA Internal Medicine* 2019;179(9):1285-87. doi: 10.1001/jamainternmed.2019.0907
4. Lerchenmüller C, Lerchenmueller MJ, Sorenson O. Long-Term Analysis of Sex Differences in Prestigious Authorships in Cardiovascular Research Supported by the National Institutes of Health. *Circulation* 2018;137(8):880-82. doi: 10.1161/circulationaha.117.032325 [published Online First: 2018/02/21]
5. Rexrode KM. The gender gap in first authorship of research papers. *BMJ* 2016;352:i1130. doi: 10.1136/bmj.i1130
6. Pinho-Gomes AC, Vassallo A, Thompson K, et al. Representation of Women Among Editors in Chief of Leading Medical Journals. *JAMA Netw Open* 2021;4(9):e2123026. doi: 10.1001/jamanetworkopen.2021.23026 [published Online First: 2021/09/09]
7. Logan D. The importance of a gender-balanced editorial team, 2016.
8. Heidari S, Babor TF, De Castro P, et al. Sex and Gender Equity in Research: rationale for the SAGER guidelines and recommended use. *Research Integrity and Peer Review* 2016;1(1):2. doi: 10.1186/s41073-016-0007-6
9. Merriman R, Galizia I, Tanaka S, et al. The gender and geography of publishing: a review of sex/gender reporting and author representation in leading general medical and global health journals. *BMJ Global Health* 2021;6(5):e005672. doi: 10.1136/bmjgh-2021-005672
10. Fox CW, Duffy MA, Fairbairn DJ, et al. Gender diversity of editorial boards and gender differences in the peer review process at six journals of ecology and evolution. *Ecology and Evolution* 2019;9(24):13636-49. doi: <https://doi.org/10.1002/ece3.5794>
11. Mauleón E, Hillán L, Moreno L, et al. Assessing gender balance among journal authors and editorial board members. *Scientometrics* 2013;95(1):87-114. doi: 10.1007/s11192-012-0824-4
12. BMJ. Recognition for reviewers [Available from: <https://authors.bmj.com/for-reviewers/reviewer-recognition/> accessed 7 December 2021.

- 1  
2  
3 13. Genderize: Our Data [Available from: <https://genderize.io/our-data> accessed 7 December  
4 2021.  
5
- 6  
7 14. Wais K. Gender Prediction Methods Based on First Names with genderizeR. *The R Journal*  
8 2016;8:17-37. doi: 10.32614/RJ-2016-002  
9
- 10  
11 15. Steinberg JJ, Skae C, Sampson B. Gender gap, disparity, and inequality in peer review. *The*  
12 *Lancet* 2018;391(10140):2602-03. doi: 10.1016/S0140-6736(18)31141-3  
13
- 14  
15 16. Squazzoni F, Bravo G, Farjam M, et al. Peer review and gender bias: A study on 145  
16 scholarly journals. *Science Advances* 2021;7(2):eabd0299. doi:  
17 doi:10.1126/sciadv.abd0299  
18
- 19  
20 17. Helmer M, Schottdorf M, Neef A, et al. Gender bias in scholarly peer review. *Elife* 2017;6  
21 doi: 10.7554/eLife.21718 [published Online First: 2017/03/23]  
22
- 23  
24 18. Garisto D. Diversifying peer review by adding junior scientists. *Nature index* 2019.  
25 [https://www.natureindex.com/news-blog/diversifying-peer-review-by-adding-](https://www.natureindex.com/news-blog/diversifying-peer-review-by-adding-junior-scientists)  
26 [junior-scientists](https://www.natureindex.com/news-blog/diversifying-peer-review-by-adding-junior-scientists) (accessed 1 January 2022).  
27
- 28  
29 19. Abramo G, Aksnes DW, D'Angelo CA. Gender differences in research performance within  
30 and between countries: Italy vs Norway. *Journal of Informetrics* 2021;15(2):101144.  
31 doi: <https://doi.org/10.1016/j.joi.2021.101144>  
32
- 33  
34 20. Bozzon R, Murgia A, Poggio B, et al. Work–life interferences in the early stages of academic  
35 careers: The case of precarious researchers in Italy. *European Educational Research*  
36 *Journal* 2017;16(2-3):332-51. doi: 10.1177/1474904116669364  
37
- 38  
39 21. Gaio Santos G, Cabral-Cardoso C. Work-family culture in academia: a gendered view of  
40 work-family conflict and coping strategies. *Gender in Management: An International*  
41 *Journal* 2008;23(6):442-57. doi: 10.1108/17542410810897553  
42
- 43  
44 22. Guarino CM, Borden VMH. Faculty Service Loads and Gender: Are Women Taking Care of  
45 the Academic Family? *Research in Higher Education* 2017;58(6):672-94. doi:  
46 10.1007/s11162-017-9454-2  
47
- 48  
49 23. Squazzoni F, Bravo G, Grimaldo F, et al. Gender gap in journal submissions and peer review  
50 during the first wave of the COVID-19 pandemic. A study on 2329 Elsevier journals.  
51 *PLOS ONE* 2021;16(10):e0257919. doi: 10.1371/journal.pone.0257919  
52
- 53  
54 24. Nature. Science benefits from diversity. *Nature* 2018;558(7708):5. doi: 10.1038/d41586-  
55 018-05326-3 [published Online First: 2019/05/12]  
56
- 57  
58 25. Nielsen MW, Alegria S, Börjeson L, et al. Opinion: Gender diversity leads to better science.  
59 *Proc Natl Acad Sci U S A* 2017;114(8):1740-42. doi: 10.1073/pnas.1700616114  
60 [published Online First: 2017/02/24]

- 1  
2  
3  
4  
5  
6  
7  
8  
9  
10  
11  
12  
13  
14  
15  
16  
17  
18  
19  
20  
21  
22  
23  
24  
25  
26  
27  
28  
29  
30  
31  
32  
33  
34  
35  
36  
37  
38  
39  
40  
41  
42  
43  
44  
45  
46  
47  
48  
49  
50  
51  
52  
53  
54  
55  
56  
57  
58  
59  
60
26. Hawkes S, Haseen F, Aounallah-Skhiri H. Measurement and meaning: reporting sex in health research. *The Lancet* 2019;393(10171):497-99. doi: 10.1016/S0140-6736(19)30283-1
  27. Recognizing the involvement of early-career researchers in peer review. *Nature Reviews Endocrinology* 2020;16(10):535-35. doi: 10.1038/s41574-020-0404-2
  28. Reviewing as a career milestone: a discussion on the importance of including trainees in the peer review process. *Commun Biol* 2021;4(1):1126. doi: 10.1038/s42003-021-02645-6 [published Online First: 2021/09/26]
  29. Martínez-López JI, Barrón-González S, Martínez López A. Which Are the Tools Available for Scholars? A Review of Assisting Software for Authors during Peer Reviewing Process. *Publications* 2019;7(3):59.
  30. Springer Nature. Reviewer Finder [Available from: <https://www.springernature.com/gp/editors/resources-tools/reviewer-finder> accessed 7 December 2021].
  31. Locke C. Why Gender Bias Still Occurs And What We Can Do About It: Forbes, 2019.
  32. García-González J, Forcén P, Jimenez-Sanchez M. Men and women differ in their perception of gender bias in research institutions. *PLOS ONE* 2019;14(12):e0225763. doi: 10.1371/journal.pone.0225763
  33. Malkinson TS, Terhune DB, Kollamkulam M, et al. Gender Imbalance in the Editorial Activities of a Researcher-led Journal. *bioRxiv* 2021:2021.11.09.467796. doi: 10.1101/2021.11.09.467796
  34. Onyeador IN, Hudson S-kTJ, Lewis NA. Moving Beyond Implicit Bias Training: Policy Insights for Increasing Organizational Diversity. *Policy Insights from the Behavioral and Brain Sciences* 2021;8(1):19-26. doi: 10.1177/2372732220983840
  35. Bezrukova K, Spell CS, Perry JL, et al. A meta-analytical integration of over 40 years of research on diversity training evaluation. *Psychol Bull* 2016;142(11):1227-74. doi: 10.1037/bul0000067 [published Online First: 2016/10/25]
  36. Nogrady B. 'I hope you die': how the COVID pandemic unleashed attacks on scientists. *Nature* 2021;598(7880):250-53. doi: 10.1038/d41586-021-02741-x [published Online First: 2021/10/15]
  37. Ross-Hellauer T, Görögh E. Guidelines for open peer review implementation. *Research Integrity and Peer Review* 2019;4(1):4. doi: 10.1186/s41073-019-0063-9
  38. Asmal L, Lamp G, Tan EJ. Considerations for improving diversity, equity and inclusivity within research designs and teams. *Psychiatry Research* 2022;307:114295. doi: <https://doi.org/10.1016/j.psychres.2021.114295>

- 1  
2  
3 39. Salazar JW, Claytor JD, Habib AR, et al. Gender, Race, Ethnicity, and Sexual Orientation of  
4 Editors at Leading Medical and Scientific Journals: A Cross-sectional Survey. *JAMA*  
5 *Internal Medicine* 2021;181(9):1248-51. doi: 10.1001/jamainternmed.2021.2363  
6  
7  
8  
9  
10  
11  
12  
13  
14  
15  
16  
17  
18  
19  
20  
21  
22  
23  
24  
25  
26  
27  
28  
29  
30  
31  
32  
33  
34  
35  
36  
37  
38  
39  
40  
41  
42  
43  
44  
45  
46  
47  
48  
49  
50  
51  
52  
53  
54  
55  
56  
57  
58  
59  
60

For peer review only

**Table 1: Representation of women among peer reviewers and editors of medical journals**

| BMJ journals                                             | No. of reviewers | % Women | % Missing | No. of editors | % Women | Gender of EIC | Citescore | Impact factor |
|----------------------------------------------------------|------------------|---------|-----------|----------------|---------|---------------|-----------|---------------|
| <i>Annals of the Rheumatic Diseases</i>                  | 529              | 23.1    | 0.4       | 12             | 25.0    | Man           | 28.7      | 19.1          |
| <i>BMJ Case Reports</i>                                  | 7179             | 23.1    | 1.1       | 11             | 27.3    | Woman         | NA        | NA            |
| <i>BMJ Global Health</i>                                 | 1325             | 41.1    | 0.8       | 16             | 25.0    | Man           | 5.5       | 5.6           |
| <i>BMJ Health &amp; Care Informatics</i>                 | 133              | 34.1    | 0.8       | 17             | 35.3    | Man           | 1.9       | NA            |
| <i>BMJ Leader</i>                                        | 162              | 47.8    | 1.9       | 14             | 35.7    | Man           | 1         | NA            |
| <i>BMJ Neurology Open</i>                                | 85               | 32.9    | 0.0       | 8              | 25.0    | Man           | NA        | NA            |
| <i>BMJ Open</i>                                          | 13041            | 36.4    | 1.3       | 14             | 50.0    | Man           | 3.7       | 2.7           |
| <i>BMJ Open Diabetes Research &amp; Care</i>             | 1038             | 30.8    | 0.9       | 8              | 0.0     | Man           | 3.3       | 3.4           |
| <i>BMJ Open Ophthalmology</i>                            | 278              | 30.1    | 0.7       | 29             | 34.5    | Man           | 2.5       | NA            |
| <i>BMJ Open Quality</i>                                  | 42               | 39.0    | 2.4       | 8              | 87.5    | Woman         | 1.1       | NA            |
| <i>BMJ Open Respiratory Research</i>                     | 340              | 24.6    | 1.8       | 3              | 0.0     | Men (2)       | 4         | NA            |
| <i>BMJ Open Science</i>                                  | 43               | 37.2    | 0.0       | 18             | 44.4    | Woman         | NA        | NA            |
| <i>BMJ Open Sport &amp; Exercise Medicine</i>            | 309              | 33.4    | 0.3       | 39             | 33.3    | Man           | 3.5       | NA            |
| <i>BMJ Paediatrics Open</i>                              | 356              | 35.0    | 0.6       | 26             | 46.2    | Man           | 2.5       | NA            |
| <i>BMJ Simulation &amp; Technology Enhanced Learning</i> | 180              | 44.4    |           | 12             |         | Woman         | 1.4       | NA            |
|                                                          |                  |         | 0.0       |                | 58.3    |               |           |               |
| <i>BMJ Supportive &amp; Palliative Care</i>              | 417              | 48.3    | 0.7       | 29             | 34.5    | Men (2)       | 4.8       | 3.6           |
| <i>British Journal of Ophthalmology</i>                  | 1113             | 24.5    | 0.3       | 3              | 0.0     | Man           | 7.3       | 4.6           |

|                                                           |      |      |     |    |      |         |      |      |
|-----------------------------------------------------------|------|------|-----|----|------|---------|------|------|
| <i>British Journal of Sports Medicine</i>                 | 693  | 28.5 | 0.1 | 15 | 40.0 | Man     | 19.2 | 13.8 |
| <i>Drug and Therapeutics Bulletin</i>                     | 64   | 31.3 | 0.0 | 12 | 33.3 | Man     | NA   | NA   |
| <i>Emergency Medicine Journal</i>                         | 767  | 26.5 | 0.0 | 6  | 50.0 | Woman   | 3.4  | 2.8  |
| <i>European Journal of Hospital Pharmacy</i>              | 203  | 40.5 | 1.5 | 16 | 37.5 | Man     | 1.6  | 1.7  |
| <i>Evidence-Based Medicine</i>                            | 271  | 33.3 | 1.5 | 11 | 63.6 | Man     | 3.2  | NA   |
| <i>Evidence-Based Mental Health</i>                       | 64   | 35.9 | 1.6 | 12 | 25.0 | Man     | 8.6  | 8.5  |
| <i>Frontline Gastroenterology</i>                         | 220  | 19.5 | 0.0 | 11 | 9.1  | Man     | 3.2  | NA   |
| <i>General Psychiatry</i>                                 | 167  | 25.7 | 0.0 | 10 | 10.0 | Man     | 4.5  | NA   |
| <i>Gut</i>                                                | 1307 | 20.2 | 0.8 | 17 | 5.9  | Man     | 35.6 | 23.1 |
| <i>Heart</i>                                              | 970  | 23.0 | 0.4 | 17 | 23.5 | Woman   | 9    | 6.0  |
| <i>Injury Prevention</i>                                  | 282  | 38.6 | 1.8 | 7  | 57.1 | Woman   | 3.7  | 2.4  |
| <i>Integrated Healthcare Journal</i>                      | 35   | 37.1 | 0.0 | 2  | 0.0  | Man     | NA   | NA   |
| <i>Journal of Clinical Pathology</i>                      | 441  | 30.9 | 1.8 | 10 | 30.0 | Man     | 5.3  | 3.4  |
| <i>Journal of Epidemiology &amp; Community Health</i>     | 548  | 40.7 | 1.5 | 22 | 27.3 | Men (2) | 6.3  | 3.7  |
| <i>Journal of Investigative Medicine</i>                  | 366  | 24.9 | 0.3 | 27 | 18.5 | Man     | 3.9  | 2.9  |
| <i>Journal of Medical Ethics</i>                          | 726  | 38.7 | 0.4 | 8  | 62.5 | Man     | 4    | 2.9  |
| <i>Journal of Medical Genetics</i>                        | 504  | 38.3 | 0.0 | 6  | 33.3 | Man     | 9.7  | 6.3  |
| <i>Journal of Neurointerventional Surgery</i>             | 788  | 11.2 | 0.5 | 16 | 12.5 | Man     | 8.2  | 5.8  |
| <i>Journal of Neurology, Neurosurgery, and Psychiatry</i> | 1126 | 19.1 |     | 8  |      | Man     | 13.5 | 10.3 |
|                                                           |      |      | 0.7 |    | 12.5 |         |      |      |
| <i>Medical Humanities</i>                                 | 198  | 50.5 | 1.0 | 5  | 60.0 | Woman   | 1.5  | NA   |

|                                                |       |      |     |     |      |         |      |      |
|------------------------------------------------|-------|------|-----|-----|------|---------|------|------|
| <b>Occupational and Environmental Medicine</b> | 440   | 40.6 | 0.0 | 15  | 33.3 | Man     | 6.8  | 4.4  |
| <b>Open Heart</b>                              | 365   | 19.2 | 0.3 | 13  | 23.1 | Man     | 3.1  | NA   |
| <b>Postgraduate Medical Journal</b>            | 429   | 24.9 | 1.6 | 12  | 16.7 | Man     | 3.3  | 2.4  |
| <b>Practical Neurology</b>                     | 118   | 16.2 | 0.8 | 6   | 0.0  | Men (2) | 3.1  | NA   |
| <b>Regional Anaesthesia and Pain Medicine</b>  | 405   | 21.4 | 1.0 | 12  | 8.3  | Men (2) | 7.9  | 6.3  |
| <b>RMD Open</b>                                | 424   | 32.9 | 1.2 | 8   | 50.0 | Man     | 6.1  | 5.1  |
| <b>The Journal of ISAKSOS Medicine</b>         | 165   | 8.0  | 1.2 | 3   | 33.3 | Man     | NA   | NA   |
| <b>Tobacco Control</b>                         | 519   | 40.9 | 1.2 | 8   | 75.0 | Woman   | 10.9 | 6.6  |
| <b>Trauma Surgery &amp; Acute Care Open</b>    | 140   | 26.1 | 1.4 | 10  | 50.0 | Man     | 1.3  | NA   |
| <b>BMJ</b>                                     | 3224  | 29.5 | 0.8 | 15  | 80.0 | Woman   | 6.9  | 38.9 |
| <b>Overall</b>                                 | 42539 | 30.2 | 0.9 | 555 | 33.4 | 19.2%   |      |      |
| <b>External comparators</b>                    |       |      |     |     |      |         |      |      |
| <b>NEJM</b>                                    | 695   | 18.9 | 0.3 | 19  | 36.8 | Man     | 80.6 | 91.2 |
| <b>JAMA</b>                                    | 2880  | 28.1 | 0.2 | 32  | 31.3 | Man     | NA   | 56.3 |

All data refer to 2020 apart from data for the BMJ, which are from 2017 as this was the last year available.

EIC, Editor-in-chief; NA, not available

### Figure legends

#### Figure 1: Representation of women as peer reviewers and editors according to the gender of the editor-in-chief

Points represent individual journals and size is proportional to the total number of peer reviewers. The colour of the points represents the gender of the editor-in-chief (turquoise for women and coral for men). Black line represents linear regression line. Spearman correlation coefficient was 0.590.

#### Figure 2: Trends in representation of women as peer reviewers

The dots represent the percentage of women as peer reviewers for each available year and journal. The colours of the lines represent different journals: BMJ, NEJM and JAMA.



1  
2  
3  
4  
5  
6  
7  
8  
9  
10  
11  
12  
13  
14  
15  
16  
17  
18  
19  
20  
21  
22  
23  
24  
25  
26  
27  
28  
29  
30  
31  
32  
33  
34  
35  
36  
37  
38  
39  
40  
41  
42  
43  
44  
45  
46  
47  
48  
49  
50  
51  
52  
53  
54  
55  
56  
57  
58  
59  
60

For peer review only

BMJ Open

25  
26  
27  
28  
29  
30  
31  
32

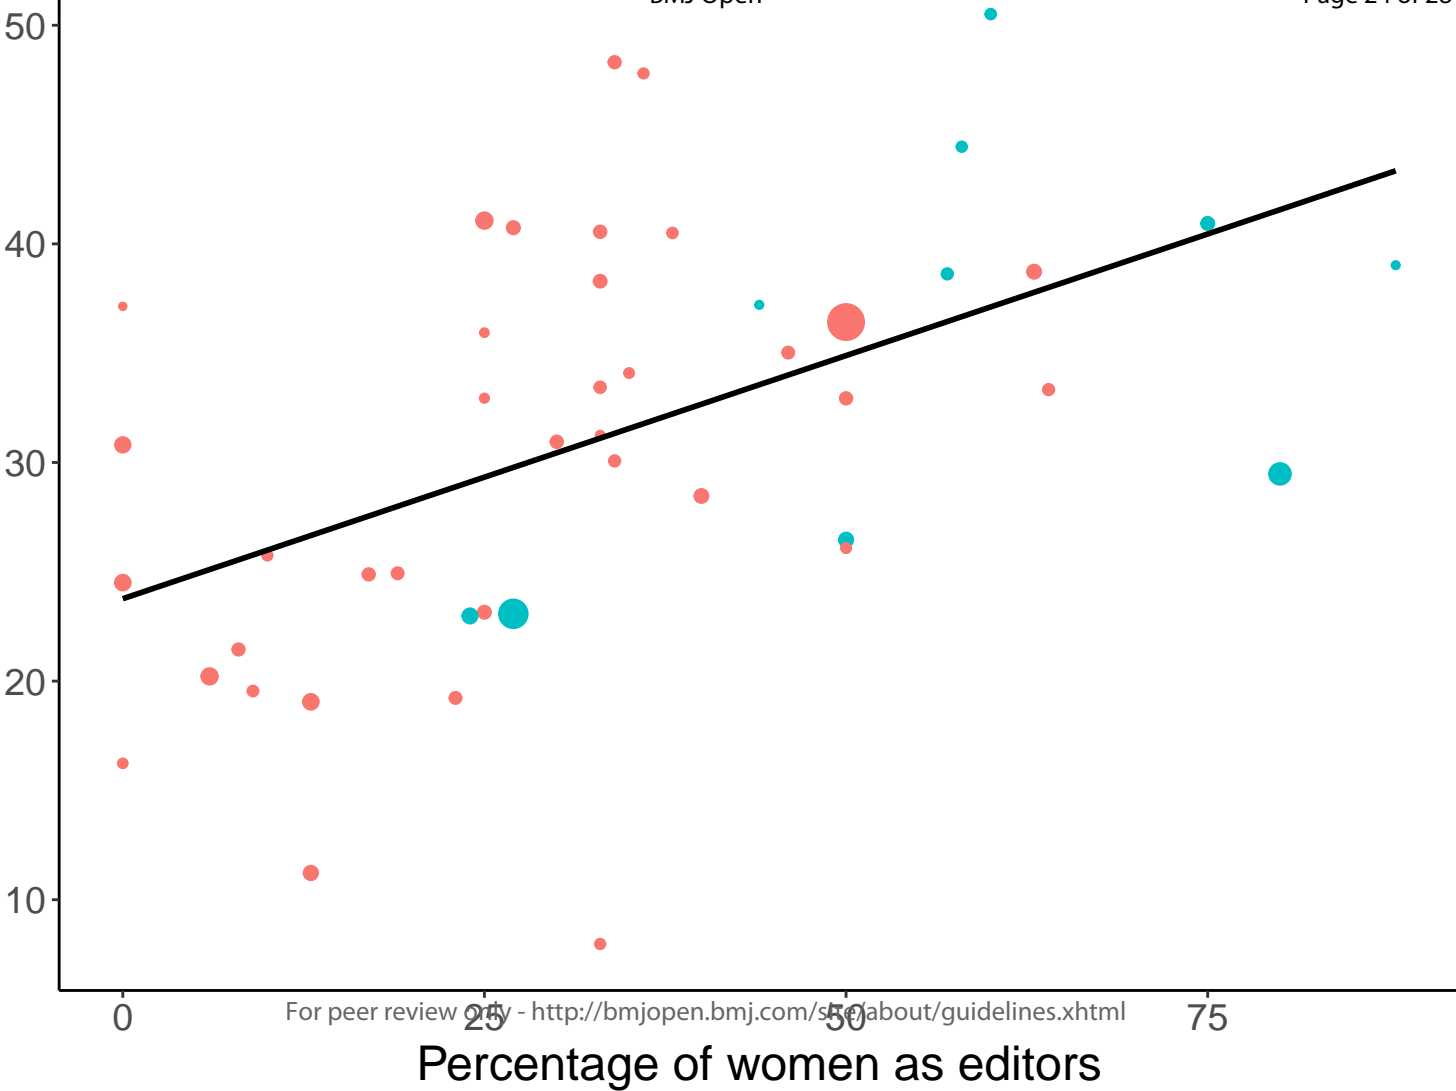

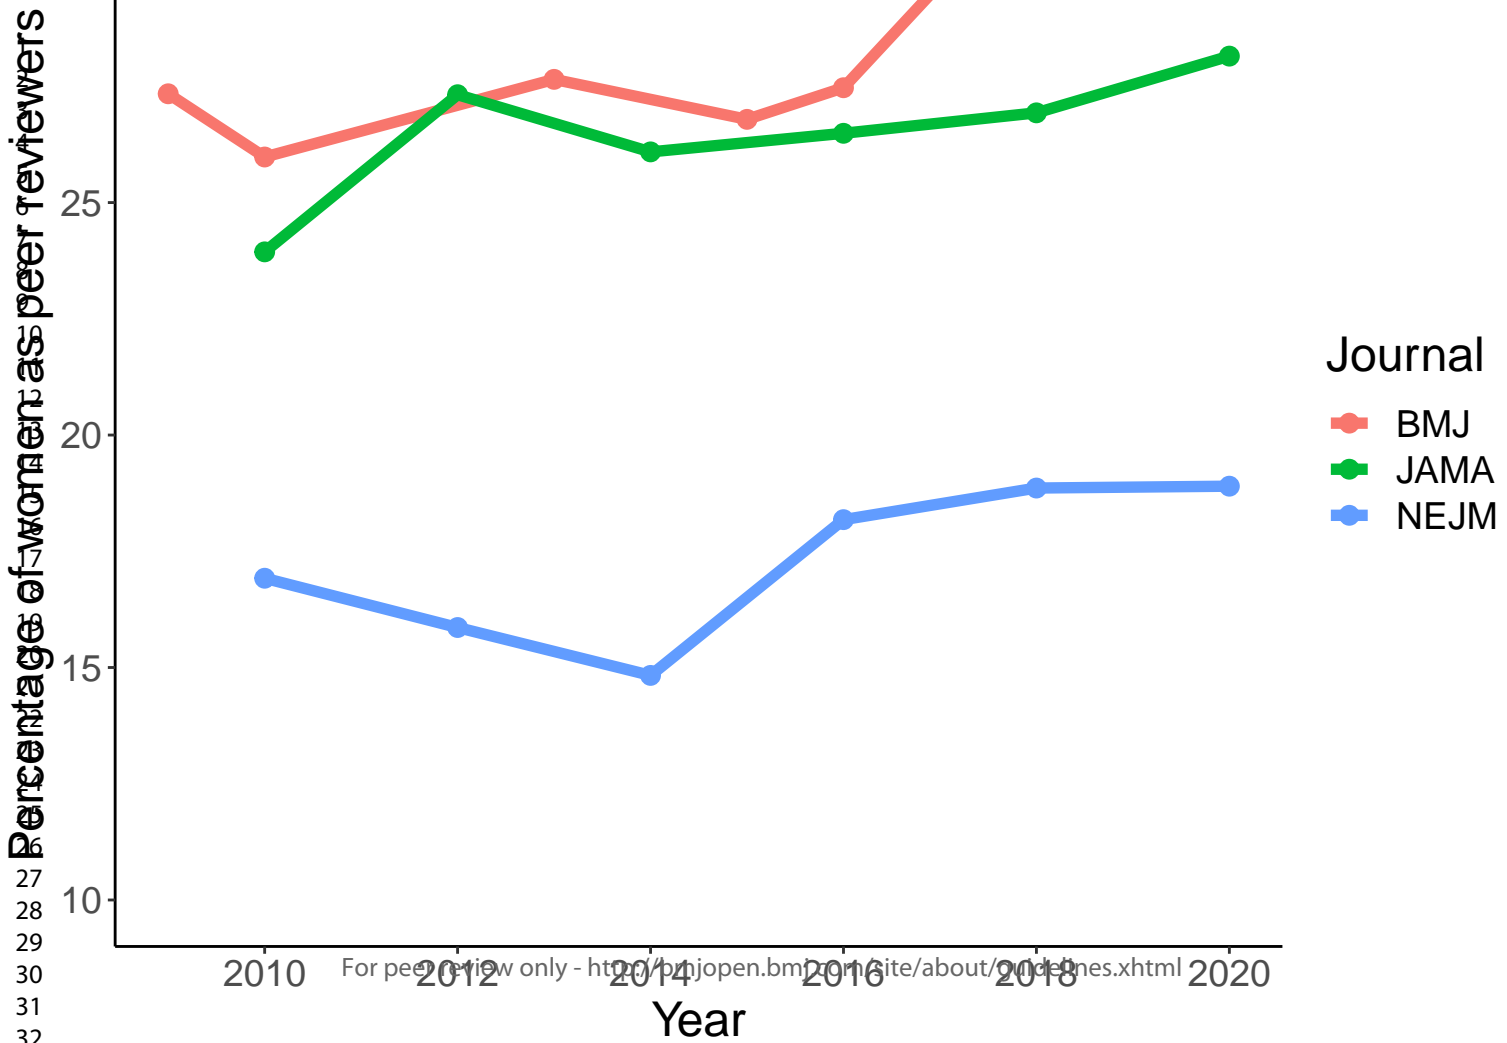

27  
28  
29  
30  
31  
32

## Supplementary data

Table S1: List of journals included and excluded due to lack of data on reviewers

| <b>BMJ journals</b>                                           | <b>Reviewers available</b> |
|---------------------------------------------------------------|----------------------------|
| Acupuncture in Medicine                                       | No                         |
| Annals of the Rheumatic Diseases                              | Yes                        |
| Archives of Disease in Childhood                              | No                         |
| Archives of Disease in Childhood Education & Practice Edition | No                         |
| Archives of Disease in Childhood Fetal & Neonatal Edition     | No                         |
| BMJ Case Reports                                              | Yes                        |
| BMJ ESMO Open                                                 | No                         |
| BMJ Global Health                                             | Yes                        |
| BMJ Health & Care Informatics                                 | Yes                        |
| BMJ Innovations                                               | No                         |
| BMJ Leader                                                    | Yes                        |
| BMJ Medicine                                                  | No                         |
| BMJ Neurology Open                                            | Yes                        |
| BMJ Nutrition, Prevention & Health                            | No                         |
| BMJ Open                                                      | Yes                        |
| BMJ Open Diabetes Research & Care                             | Yes                        |
| BMJ Open Gastroenterology                                     | No                         |
| BMJ Open Ophthalmology                                        | Yes                        |
| BMJ Open Quality                                              | Yes                        |
| BMJ Open Respiratory Research                                 | Yes                        |
| BMJ Open Science                                              | Yes                        |
| BMJ Open Sport & Exercise Medicine                            | Yes                        |
| BMJ Paediatrics Open                                          | Yes                        |
| BMJ Quality & Safety                                          | No                         |
| BMJ Sexual & Reproductive Health                              | No                         |
| BMJ Simulation & Technology Enhanced Learning                 | Yes                        |
| BMJ Supportive & Palliative Care                              | Yes                        |
| BMJ Surgery, Interventions & Health Technologies              | No                         |
| British Journal of Ophthalmology                              | Yes                        |
| British Journal of Sports Medicine                            | Yes                        |
| Considerations in Medicine                                    | No                         |
| Drug and Therapeutics Bulletin                                | Yes                        |
| Emergency Medicine Journal                                    | Yes                        |
| European Journal of Hospital Pharmacy                         | Yes                        |
| Evidence-Based Medicine                                       | Yes                        |
| Evidence-Based Mental Health                                  | Yes                        |
| Evidence-Based Nursing                                        | No                         |

|    |                                                                                                                    |              |
|----|--------------------------------------------------------------------------------------------------------------------|--------------|
| 1  |                                                                                                                    |              |
| 2  |                                                                                                                    |              |
| 3  | <b>Family Medicine and Community Health</b>                                                                        | No           |
| 4  | <b>Frontline Gastroenterology</b>                                                                                  | Yes          |
| 5  | <b>General Psychiatry</b>                                                                                          | Yes          |
| 6  | <b>Gut</b>                                                                                                         | Yes          |
| 7  | <b>Heart</b>                                                                                                       | Yes          |
| 8  | <b>Heart Asia</b>                                                                                                  | No           |
| 9  | <b>In Practice</b>                                                                                                 | No           |
| 10 | <b>Injury Prevention</b>                                                                                           | Yes          |
| 11 | <b>Integrated Healthcare Journal</b>                                                                               | Yes          |
| 12 | <b>International Journal of Gynecological Cancer</b>                                                               | No           |
| 13 | <b>Journal for ImmunoTherapy of Cancer</b>                                                                         | No           |
| 14 | <b>Journal of Clinical Pathology</b>                                                                               | Yes          |
| 15 | <b>Journal of Epidemiology &amp; Community Health</b>                                                              | Yes          |
| 16 | <b>Journal of Family Planning and Reproductive Health Care</b>                                                     | No           |
| 17 | <b>Journal of Investigative Medicine</b>                                                                           | Yes          |
| 18 | <b>Journal of Medical Ethics</b>                                                                                   | Yes          |
| 19 | <b>Journal of Medical Genetics</b>                                                                                 | Yes          |
| 20 | <b>Journal of NeuroInterventional Surgery</b>                                                                      | Yes          |
| 21 | <b>Journal of Neurology, Neurosurgery, and Psychiatry</b>                                                          | Yes          |
| 22 | <b>Journal of the Royal Army Corps</b>                                                                             | No           |
| 23 | <b>Lupus Science &amp; Medicine</b>                                                                                | No           |
| 24 | <b>Medical Humanities</b>                                                                                          | Yes          |
| 25 | <b>Occupational and Environmental Medicine</b>                                                                     | Yes          |
| 26 | <b>Open Heart</b>                                                                                                  | Yes          |
| 27 | <b>Postgraduate Medical Journal</b>                                                                                | Yes          |
| 28 | <b>Practical Neurology</b>                                                                                         | Yes          |
| 29 | <b>Regional Anaesthesia and Pain Medicine</b>                                                                      | Yes          |
| 30 | <b>RMD Open: Rheumatic and Musculoskeletal disorders</b>                                                           | Yes          |
| 31 | <b>Sexually Transmitted Infections</b>                                                                             | No           |
| 32 | <b>Stroke and Vascular Neurology (SVN)</b>                                                                         | No           |
| 33 | <b>Student BMJ</b>                                                                                                 | No           |
| 34 | <b>The Journal of International Society of Arthroscopy, Knee Surgery and Orthopaedic Sports (ISAKSOS) Medicine</b> | Yes          |
| 35 | <b>Thorax</b>                                                                                                      | No           |
| 36 | <b>Tobacco Control</b>                                                                                             | Yes          |
| 37 | <b>Trauma Surgery &amp; Acute Care Open</b>                                                                        | Yes          |
| 38 | <b>World Journal of Pediatric Surgery</b>                                                                          | No           |
| 39 | <b>BMJ</b>                                                                                                         | 2009 to 2017 |
| 40 | <b>NEJM</b>                                                                                                        | Yes          |
| 41 | <b>JAMA</b>                                                                                                        | Yes          |
| 42 |                                                                                                                    |              |
| 43 |                                                                                                                    |              |
| 44 |                                                                                                                    |              |
| 45 |                                                                                                                    |              |
| 46 |                                                                                                                    |              |
| 47 |                                                                                                                    |              |
| 48 |                                                                                                                    |              |
| 49 |                                                                                                                    |              |
| 50 |                                                                                                                    |              |
| 51 |                                                                                                                    |              |
| 52 |                                                                                                                    |              |
| 53 |                                                                                                                    |              |
| 54 |                                                                                                                    |              |
| 55 |                                                                                                                    |              |
| 56 |                                                                                                                    |              |
| 57 |                                                                                                                    |              |
| 58 |                                                                                                                    |              |
| 59 |                                                                                                                    |              |
| 60 |                                                                                                                    |              |

**Table S2: Representation of women as peer reviewer in the British Medical Journal, New England Journal of Medicine and Journal of the American Medical Association**

| Year                                               | Reviewers | % Women | % Missing |
|----------------------------------------------------|-----------|---------|-----------|
| <b>British Medical Journal</b>                     |           |         |           |
| 2009                                               | 2576      | 27.3    | 0.0       |
| 2010                                               | 2711      | 26.0    | 0.0       |
| 2013                                               | 1876      | 27.6    | 0.9       |
| 2014                                               | 3650      | 26.8    | 0.7       |
| 2015                                               | 3354      | 27.5    | 0.9       |
| 2016                                               | 3136      | 29.7    | 0.7       |
| 2017                                               | 2880      | 29.5    | 0.8       |
| <b>New England Journal of Medicine</b>             |           |         |           |
| 2010                                               | 858       | 16.9    | 0.1       |
| 2012                                               | 864       | 15.9    | 0.0       |
| 2014                                               | 654       | 14.8    | 0.0       |
| 2016                                               | 629       | 18.2    | 0.3       |
| 2018                                               | 578       | 18.9    | 0.0       |
| 2020                                               | 695       | 18.9    | 0.3       |
| <b>Journal of the American Medical Association</b> |           |         |           |
| 2010                                               | 3419      | 23.9    | 0.6       |
| 2012                                               | 3791      | 27.3    | 1.5       |
| 2014                                               | 3819      | 26.1    | 0.2       |
| 2016                                               | 2925      | 26.5    | 0.2       |
| 2018                                               | 2710      | 26.9    | 0.1       |
| 2020                                               | 2880      | 28.1    | 0.2       |

Figure S1: Percentage of women as peer reviewers according to impact factor and Citescore of journals

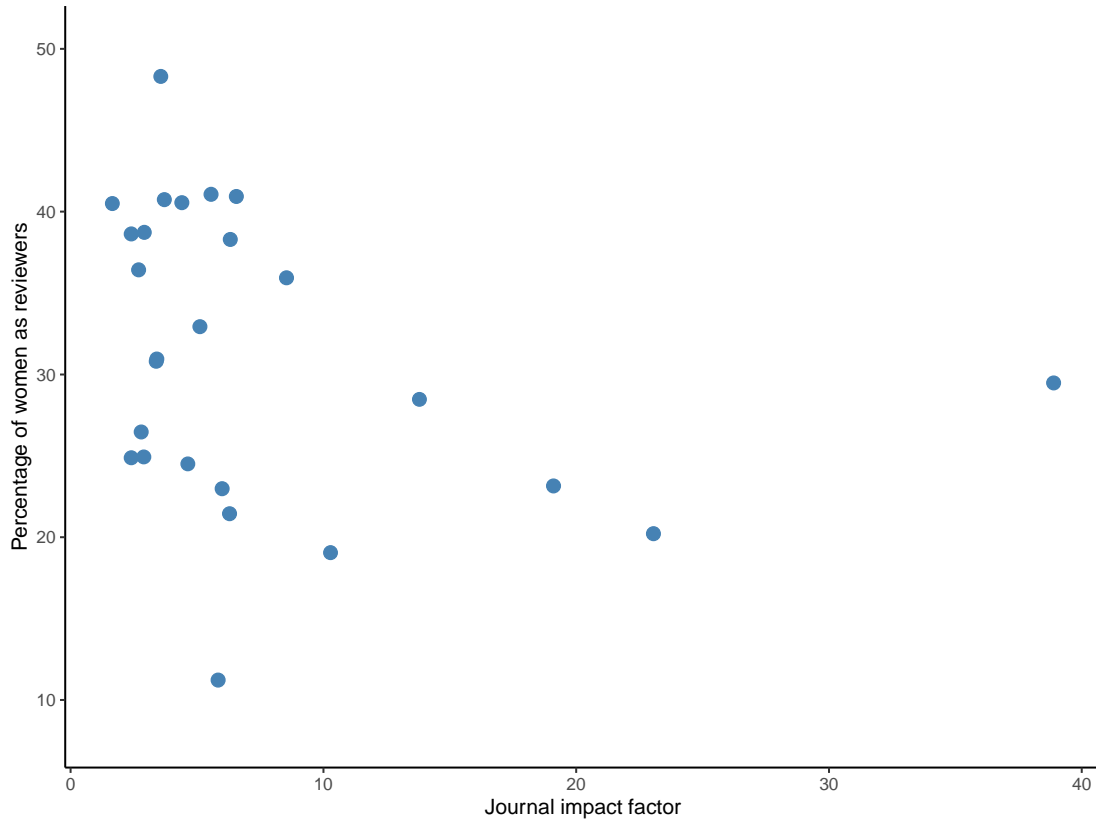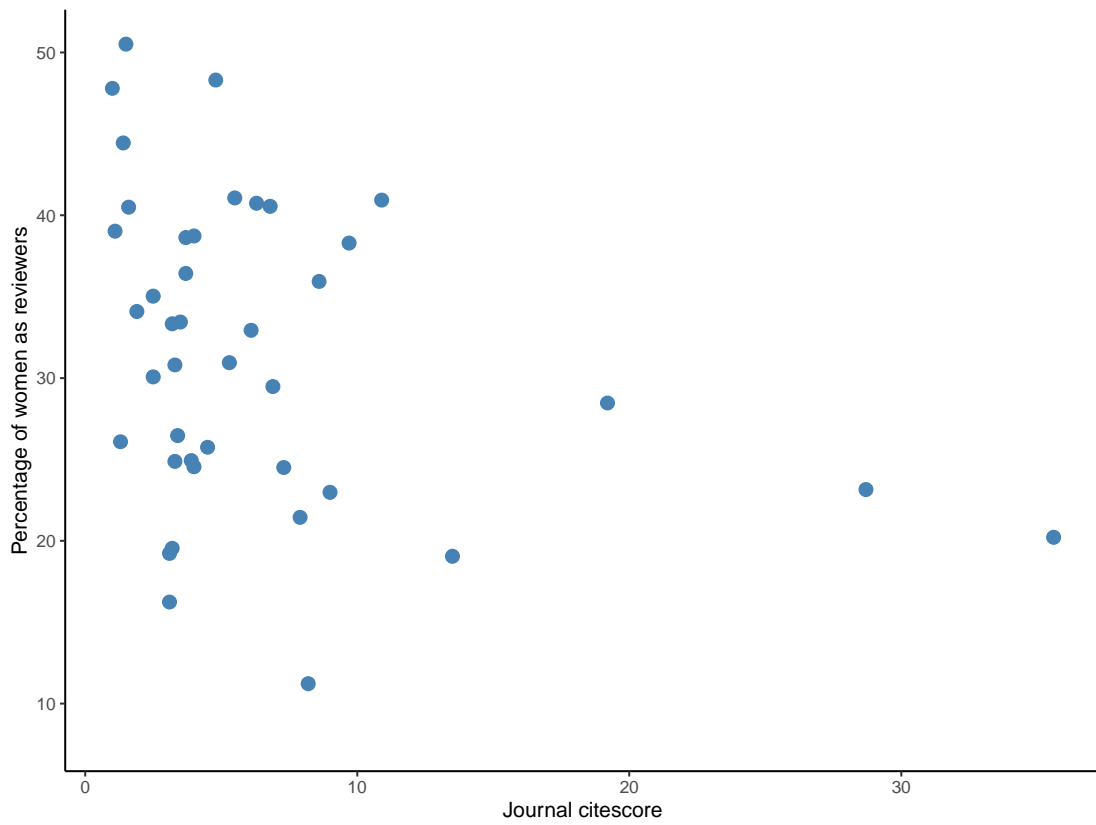

Impact factor was not available for 21 journals and Citescore was not available for 6 journals.

# BMJ Open

## A cross-sectional study of the relationship between women's representation amongst editors and peer reviewers in journals of the British Medical Journal Publishing Group

|                                 |                                                                                                                                                                                                                                                                                                                  |
|---------------------------------|------------------------------------------------------------------------------------------------------------------------------------------------------------------------------------------------------------------------------------------------------------------------------------------------------------------|
| Journal:                        | <i>BMJ Open</i>                                                                                                                                                                                                                                                                                                  |
| Manuscript ID                   | bmjopen-2022-061054.R1                                                                                                                                                                                                                                                                                           |
| Article Type:                   | Original research                                                                                                                                                                                                                                                                                                |
| Date Submitted by the Author:   | 17-Mar-2022                                                                                                                                                                                                                                                                                                      |
| Complete List of Authors:       | Pinho-Gomes, Ana-Catarina; Imperial College London, The George Institute for Global Health; King's College London<br>Vassallo, Amy; The George Institute for Global Health<br>Woodward, Mark; The George Institute for Global Health, Professorial Unit<br>Peters, Sanne; The George Institute for Global Health |
| <b>Primary Subject Heading</b>: | Medical publishing and peer review                                                                                                                                                                                                                                                                               |
| Secondary Subject Heading:      | Health policy                                                                                                                                                                                                                                                                                                    |
| Keywords:                       | GENERAL MEDICINE (see Internal Medicine), MEDICAL ETHICS, MEDICAL EDUCATION & TRAINING                                                                                                                                                                                                                           |
|                                 |                                                                                                                                                                                                                                                                                                                  |

SCHOLARONE™  
Manuscripts





I, the Submitting Author has the right to grant and does grant on behalf of all authors of the Work (as defined in the below author licence), an exclusive licence and/or a non-exclusive licence for contributions from authors who are: i) UK Crown employees; ii) where BMJ has agreed a CC-BY licence shall apply, and/or iii) in accordance with the terms applicable for US Federal Government officers or employees acting as part of their official duties; on a worldwide, perpetual, irrevocable, royalty-free basis to BMJ Publishing Group Ltd ("BMJ") its licensees and where the relevant Journal is co-owned by BMJ to the co-owners of the Journal, to publish the Work in this journal and any other BMJ products and to exploit all rights, as set out in our [licence](#).

The Submitting Author accepts and understands that any supply made under these terms is made by BMJ to the Submitting Author unless you are acting as an employee on behalf of your employer or a postgraduate student of an affiliated institution which is paying any applicable article publishing charge ("APC") for Open Access articles. Where the Submitting Author wishes to make the Work available on an Open Access basis (and intends to pay the relevant APC), the terms of reuse of such Open Access shall be governed by a Creative Commons licence – details of these licences and which [Creative Commons](#) licence will apply to this Work are set out in our licence referred to above.

Other than as permitted in any relevant BMJ Author's Self Archiving Policies, I confirm this Work has not been accepted for publication elsewhere, is not being considered for publication elsewhere and does not duplicate material already published. I confirm all authors consent to publication of this Work and authorise the granting of this licence.

1  
2  
3 **A cross-sectional study of the relationship between women's representation amongst**  
4 **editors and peer reviewers in journals of the British Medical Journal Publishing Group**  
5  
6  
7

8 Ana-Catarina Pinho-Gomes, DPhil<sup>1,2</sup>, Amy Vassallo, PhD<sup>3</sup>, Mark Woodward, PhD<sup>1,3</sup>, Sanne A.E. Peters,  
9 PhD<sup>1,3,4</sup>  
10  
11  
12  
13  
14

15 <sup>1</sup>The George Institute for Global Health, School of Public Health, Imperial College London, London,  
16 UK  
17

18 <sup>2</sup>School of Population Health & Environmental Sciences, Faculty of Life Sciences & Medicine, King's  
19 College London, London, UK  
20  
21

22 <sup>3</sup>The George Institute for Global Health, University of New South Wales, Sydney, New South Wales,  
23 Australia  
24

25 <sup>4</sup>Julius Center for Health Sciences and Primary Care, University Medical Center Utrecht, Utrecht  
26 University, Utrecht, The Netherlands  
27  
28  
29  
30  
31

32 **Word count 3,184**  
33  
34  
35  
36  
37  
38  
39  
40  
41  
42  
43

44 **Corresponding author:**

45 Ana-Catarina Pinho-Gomes

46 The George Institute for Global Health, Imperial College London

47 Email: a.pinho-gomes@imperial.ac.uk  
48  
49  
50  
51  
52  
53  
54  
55  
56  
57  
58  
59  
60

## Abstract

**Objectives:** To investigate whether there is an association between women's representation as peer reviewers and editors of medical journals.

**Methods:** In this cross-sectional study, the gender of editors and peer reviewers of journals of the British Medical Journals Publishing Group (BMJ-PG) in 2020 was determined based on given names. Trends over time were analysed for the BMJ between 2009 and 2017.

**Results:** Overall, this study included 47 of the 74 journals in the BMJ-PG. Women accounted for 30.2% of the 42,539 peer reviewers, with marked variation from 8 to 50%. Women represented 33.4% of the 555 editors, including 19.2% of the 52 editors-in-chief. There was a moderate positive correlation between the percentage of women as editors and as reviewers (Spearman correlation coefficient 0.590;  $p < 0.0001$ ). The percentage of women as editors, excluding editors-in-chief, was higher when the editor-in-chief was a woman than a man (53.3% versus 29.2%, respectively;  $p < 0.0001$ ). Likewise, the percentage of women as peer reviewers was higher in journals that had a woman as editor-in-chief in comparison with a man (32.0% versus 26.4%, respectively;  $p < 0.0001$ ). There was a slight increase in the percentage of women as peer reviewers from 27.3% in 2009 to 29.7% in 2017 in the BMJ.

**Conclusions:** Women account for less than one in three peer reviewers of medical journals. Women's representation as peer reviewers is higher in journals with higher percentage of women as editors or with a woman as editor-in-chief. It is, thus, imperative to address the persisting gender gap at all levels of the publishing system.

## Article summary

### Strengths and limitations

- This study included journals from a large and renowned family of journals, which enable including over 40,000 peer reviewers and 500 editors.
- Gender identification based on pronouns for editors enabled considering non-binary gender, even if no their/theirs pronouns were used.
- By relying on a binary assignment of gender based on given names for reviewers, this study failed to account for non-binary gender or gender identities that did not match that of the given name.
- This study used journals from a single publishing family, which might not be representative of all medical journals.
- It is impossible to ascertain whether the observed correlation between women's representation among editors and peer reviewers is causal.

## Introduction

Women's underrepresentation in the publishing system, including in medicine, is well-established, with stark gender inequalities among authors of scientific papers, particularly at senior levels.<sup>1 2</sup>

Overall, women account for 20 to 40% of first authors and for 15 to 30% of last authors.<sup>3-5</sup> Women are also underrepresented among editors-in-chief of medical journals and more widely in scientific editorial boards.<sup>6 7</sup>

Peer reviewers play a pivotal role in the publishing process and exert a strong influence on what research eventually gets published and in what calibre of journal. Peer reviewers also have an important role in ensuring scientific publications adhere to reporting standards and guidelines, particularly those for the incorporation of sex and gender analyses.<sup>8</sup> Since women as authors are more likely to report sex- and gender-disaggregated analyses, women as peer reviewers may also be more likely than men to ensure that sex and gender are adequately handled in medical papers.<sup>9</sup> Gender inequality among peer reviewers may, thus, have detrimental consequences for progress in medical knowledge and, ultimately, population health. However, the inclusion of women as peer reviewers of medical journals has received less attention, probably due to the lack of detailed publicly available data on peer reviewers.

In addition, although women's representation among journal editors has been positively associated with women's representation among authors, this association remains poorly understood for peer reviewers, particularly in medical journals.<sup>10</sup> Indeed, the choice of peer reviewers is influenced by myriad factors, and hence it is uncertain to what extent gender influences editors' decisions, either consciously or unconsciously.<sup>11</sup> Therefore, this study aimed to determine women's representation among peer reviewers and editors of medical journals, and investigate whether greater women's representation among editors correlated with greater representation as peer reviewers.

## Methods

### Data sources and definitions

Among the major families of journals, only the British Medical Journal (BMJ) Publishing Group (BMJ-PG) requires their journals to report annually a list of their contributing peer reviewers.<sup>12</sup> The BMJ-PG is a large family of journals, which covers most medical specialties, as well as other fields of research related to health services (e.g., quality improvement and safety). As data for peer reviewers were not publicly available for other publishers, or families of medical journals, they were not eligible for this study. We conducted a systematic search on Google for the list of peer reviewers for each of the journals in the BMJ-PG in 2020. Given names were extracted for all peer reviewers. For all journals of the BMJ-PG, apart the BMJ, data were available only for 2020, and we used those data to investigate current representation of women in the BMJ-PG overall.

In addition, we investigated trends over time in women's representation using data available for peer reviewers in the BMJ for 2009, 2010, and 2013 to 2017. Data were not available for the BMJ after 2017. For comparison, the list of peer reviewers in 2010, 2012, 2014, 2016, 2018, and 2020 for two leading medical journals (The New England Journal of Medicine (NEJM) and Journal of the American Medical Association (JAMA)) were also reviewed and given names of reviewers extracted. These two journals were not included in the analysis of BMJ-PG journals.

We used the "genderizeR" package for R to predict the gender of the peer reviewers based on their given names. This software collects data from the Internet and includes 38,659 given names from 242 countries across the globe.<sup>13</sup> A two-step approach was used to determine gender based on given names.<sup>14</sup> First, given names were extracted from full names using a specific feature of the GenderizeR package. Second, the gender of the vector of given names was classified as either woman or man using another feature of the package. When given names could not be recognised and extracted from full names by the software, those reviewers were considered as "missing" and excluded from all analyses.

For each journal, data for editor-in-chief, deputy editors, assistant editors and associate editors were extracted. These are defined as "editors" throughout the manuscript. Their gender was determined based on pronouns and photographs available on the journal website or professional affiliations. Other members of editorial boards (e.g., advisory editors, statistical advisors, emeritus editors) were excluded.

Data on the impact factor and Citescore for 2020 were extracted from the journal website. CiteScore is a measure reflecting the yearly average number of citations of articles published in that journal.

1  
2  
3 This metric was launched in December 2016 by Elsevier as an alternative to the generally used  
4 impact factors calculated by Clarivate Analytics and published in the Journal Citation Reports.  
5 CiteScore is based on the citations recorded in the Scopus database rather than in Journal Citation  
6 Reports, and those citations are collected for articles published in the preceding four years instead  
7 of two or five. We used these two metrics to assess impact because impact factor was not available  
8 for 21 journals, of which 15 had a Citescore available.  
9  
10  
11  
12  
13  
14

#### 15 Data analysis

16 We computed the percentage of women among peer reviewers and editors overall and for each  
17 journal. We plotted the association between the percentage of women as peer reviewers and  
18 editors, stratified by gender of the editor-in-chief. We computed the Spearman correlation  
19 coefficients between the percentage of women as editors and the percentage of women as peer  
20 reviewers and between the percentage of women as peer reviewers and the journal impact factor  
21 and Citescore. We compared the percentage of women among peer reviewers and editors according  
22 to the gender of the editor-in-chief using Fisher's exact test. All data analyses used R version 4.0.2 (R  
23 Core Team, 2020).  
24  
25  
26  
27  
28  
29  
30

#### 31 Patient and Public Involvement

32 Patients and the public were not involved in this study.  
33  
34  
35  
36  
37  
38  
39  
40  
41  
42  
43  
44  
45  
46  
47  
48  
49  
50  
51  
52  
53  
54  
55  
56  
57  
58  
59  
60

## Results

The BMJ-PG publishes 74 journals, of which 47 were included in the analysis because reviewers' names were not available for 27 journals (**Table S1**).

### Women as peer reviewers

Overall, women accounted for 30.2% of the 42,539 peer reviewers in 2020 (**Table 1**). There was marked variation in women's representation across journals (median 31.3%, interquartile range 24.5% to 38.5%), ranging from 8% for *The Journal of the International Society of Arthroscopy, Knee Surgery and Orthopaedic Sports Medicine* to 50% in *Medical Humanities*. No journal had more than 50% women reviewers. Women's representation among peer reviewers in the BMJ-PG was higher than in the *JAMA* (28.1%) and the *NEJM* (18.9%).

### Women as editors

Overall, women represented 33.4% of the 555 editors, including 19.2% of the 52 editors-in-chief in 2020 (**Table 1**). There were five journals with more than one editor-in-chief, all of which had two men as editors-in-chief. There were five journals with no woman among their editors and twelve journals in which women's representation was equal or above 50% (**Table 1**). Among those twelve journals, seven had a woman as editor-in-chief. The highest women's representation was 88% in *BMJ Open Quality*.

### Association between women as editors and peer reviewers

There was a moderate positive correlation between the percentage of women as editors and as reviewers (Spearman correlation coefficient 0.590;  $p < 0.0001$ ) (**Figure 1**). The percentage of women as editors, excluding editors-in-chief, was higher when the editor-in-chief was a woman than a man (53.3% versus 29.2%, respectively;  $p < 0.0001$ ). Likewise, the percentage of women as peer reviewers was higher in journals that had a woman as editor-in-chief in comparison with a man (32.0% versus 26.4%, respectively;  $p < 0.0001$ ).

### Trends over time and by impact metrics

The percentage of women as peer reviewers increased slightly from 27.3% in 2010 to 29.7% in 2017 in the BMJ, from 23.9% in 2010 to 28.1% in 2020 in *JAMA*, and from 16.9% in 2010 to 18.9% in 2020 in the *NEJM* (**Figure 2 and Table S2**). The impact factor of the journals varied between 1.7 for the *European Journal of Hospital Pharmacy* and 38.8 for the *BMJ*, and the Citescore ranged from 1 for *BMJ Leader* to 35.6 for *Gut* (**Table 1**). The impact factors of the *NEJM* and *JAMA* were 91.2 and 56.3,



1  
2  
3 respectively. The Citescore of the NEJM was 80.6, and there was no Citescore for JAMA. There was a  
4 non-significant negative correlation between the impact of the journal and the percentage of  
5 women as peer reviewers (**Figure S1**). The Spearman correlation coefficient was -0.288 ( $p=0.068$ ),  
6 when using Citescore, and -0.343 ( $p=0.087$ ), when using impact factor. There was a modest negative  
7 correlation between the impact of the journal and the percentage of women as editors when using  
8 Citescore (Spearman correlation coefficient -0.310,  $p=0.049$ ), but not when using impact factor  
9 (Spearman correlation coefficient -0.152,  $p=0.459$ ).  
10  
11  
12  
13  
14  
15  
16  
17  
18  
19  
20  
21  
22  
23  
24  
25  
26  
27  
28  
29  
30  
31  
32  
33  
34  
35  
36  
37  
38  
39  
40  
41  
42  
43  
44  
45  
46  
47  
48  
49  
50  
51  
52  
53  
54  
55  
56  
57  
58  
59  
60

For peer review only

## Discussion

In this study of women's representation among peer reviewers of medical journals in the BMJ-PG, women accounted for 30% of peer reviewers in 2020, with variation from 8% to 50 and no evidence of a meaningful change between 2009 and 2017 in the BMJ. Women were also underrepresented among editors, where they accounted for 33% of the editors and 19% of editors-in-chief. Twelve journals (25%) had 50% or more women editors, and five journals had no women editors. Women's representation among peer reviewers was higher in journals with a higher representation of women as editors, or with a woman as editor-in-chief, as well as in journals with lower impact factor.

Our finding that women account for less than one in three peer reviewers is in keeping with previous studies, which used different methods and samples of journals. In the Frontiers family of journals, women accounted for only 28% of 43,000 peer reviewers between 2007 and 2015.<sup>15</sup> More recently, women were found to represent 21% of 740,000 peer reviewers across 145 journals in various fields of research, including physical, biomedical and social sciences.<sup>16</sup> Women's representation as peer reviewers was 25% in journals related to biomedicine and health, 21% in life sciences, 16% in physical sciences, and 38% in social sciences and humanities. Although the latter study had access to privileged information provided by publishers, it was based on a sample of journals selected by the publishers, which may not have been a random sample. Notwithstanding the limitations of ascertaining gender based on given names, the consistency of our findings with those of different publishers and journal families supports the validity of the conclusion that women are underrepresented as peer reviewers. Furthermore, as we included more recent data, the lack of progress towards gender equity is disappointing.

The underlying reasons for women's underrepresentation as peer reviewers of medical journals are likely manifold. First, bias, even if unconscious, may influence editors' decision to invite a man rather than a woman to peer review a manuscript. Our findings that men are disproportionately represented as editors, and that this is associated with a lower representation of women as peer reviewers in comparison to men, support the possibility of such gender affinity bias. Indeed, a previous study demonstrated editors have substantial same-gender preference when selecting peer reviewers irrespective of whether they are women or men.<sup>17</sup> Likewise, having women as editors-in-chief has been associated with increased representation of women in peer review.<sup>18</sup> Second, considering that peer reviewers are usually senior researchers or leaders in their fields,<sup>18</sup> the longstanding under-representation of women in senior academic roles may leave editors with seemingly little choice but to invite men to peer review manuscripts.<sup>19</sup> This is supported by our

1  
2  
3 finding that women's representation as peer reviewers was lower in journals with higher impact  
4 factor, which are more likely to acquire peer reviewers who are leading experts in their field. Third, it  
5 is possible women face barriers that prevent them from accepting invitations to take part in the peer  
6 review process due to competing demands. Deeply entrenched gendered roles in our contemporary  
7 societies mean women still bear the brunt of homemaking, childcare, other unpaid care roles.<sup>20 21</sup>  
8 Furthermore, women undertake a greater share of internal service in academic institutions (e.g.,  
9 activities related to faculty governance, faculty recruitment, evaluation and promotion, student  
10 admissions and scholarships, programme supervision, development and marketing, internal awards)  
11 in comparison to men.<sup>22</sup> Taken together, these unpaid commitments reduce women's availability to  
12 engage with scholarly activities with unscheduled and tight deadlines, such as peer review. Although  
13 a recent study showed a minimal difference between women and men's acceptance of peer review  
14 invitations (37% for women versus 41% for men), there was a significant decline during the COVID-  
15 19 pandemic in acceptance rates for women, but not for men, in health and medicine journals.<sup>23</sup> This  
16 strengthens the argument that the greater burden of caring and family responsibilities posed on  
17 women, which was exacerbated during the pandemic, may jeopardise women's ability to engage  
18 with peer review.  
19  
20  
21  
22  
23  
24  
25  
26  
27  
28  
29  
30

31 The findings of this study have important implications. The wider benefits of gender equality for  
32 science and medicine have been compelling demonstrated for men as well as women.<sup>24 25</sup> Indeed, a  
33 research community that is more inclusive, diverse, and representative, and works to ensure that  
34 everyone counts, is more likely to generate research that is universally beneficial and not limited by  
35 inequalities.<sup>26</sup> Peer reviewers share with editors the role of gatekeepers of science and evidence.  
36 Besides scrutinising and evaluating the quality and integrity of manuscripts, they often influence the  
37 content. Ultimately, peer reviewers support editors in determining whether manuscripts are  
38 published or not and in which class of journal. Therefore, disproportionate representation of men  
39 among peer reviewers and editors could have deleterious consequences on the research that is  
40 published as well as its reach and impact on the scientific community and general public. Lack of  
41 gender diversity means evidence published in the highest impact journals might be swayed in favour  
42 of topics, or methods that are preferred by men and framed from their point of view, thus failing to  
43 account for the important perspective and priorities of women. On the other hand, women's under-  
44 representation as peer reviewers may be both a symptom and a cause of broader under-  
45 representation in senior positions in academia and journals as taking part in the peer review process  
46 can be a career milestone and a stepping stone to leadership roles.<sup>27 28</sup>  
47  
48  
49  
50  
51  
52  
53  
54  
55  
56  
57  
58  
59  
60

1  
2  
3 Although it is unclear how to resolve the longstanding gender gap in the publishing system,  
4 particularly in medical sciences, taking small yet steady steps in the right direction and monitoring  
5 their effects is a positive approach.<sup>20</sup> First, editors should be mindful of the inherent properties of  
6 software tools available to help them find suitable peer reviewers.<sup>29</sup> Those tools draw on databases  
7 of authors and use matching algorithms, which means they are inherently bound to replicate or  
8 expand the gender gap in authorship. For instance, Reviewer Finder is a matching algorithm that  
9 returns researchers who have a publishing profile similar to that of the manuscript author(s).<sup>30</sup> As  
10 men are disproportionately represented among authors of papers across many scientific fields,  
11 matching is likely to lead to similar gender gaps in potential peer reviewers, unless algorithms are  
12 pre-set to suggest a gender balanced pool of peer reviewers. Second, publishers should ensure they  
13 have clear policies promoting gender equality (e.g., gender quotas) in their editorial boards. Men  
14 appear, in general, less aware of gender bias in academia than women, yet hold the majority of  
15 leadership positions in publishing which may exacerbate unrecognised biases if clear policies are not  
16 in place.<sup>31 32</sup> However, evidence from a researcher-led journal suggests improving women's  
17 representation (e.g., by gender quotas) may not be enough to stem deep-rooted gender bias  
18 observed along the editorial process.<sup>33</sup> For instance, senior editors and authors were more likely to  
19 select men than women as reviewing editors, even after correcting for the gender imbalance in the  
20 pool of reviewing editors available.<sup>33</sup> Third, publishers should provide training to editors and other  
21 editorial staff on diversity and unconscious gender bias to counteract its effects. Although equality  
22 and diversity training is no magic wand to address longstanding gender inequalities,<sup>34</sup> it may have  
23 benefits on cognitive, behavioural and attitudinal/affective learning, especially when complemented  
24 by other initiatives targeted to both awareness and skills development, and conducted over a  
25 significant period of time.<sup>35</sup> Fourth, to improve transparency and accountability, publishers should  
26 consider adopting open peer review (i.e., publishing the names of the reviewers and the content of  
27 the review with the article) or making the names of their peer reviewers publicly available, for  
28 instance as an overall acknowledgement not linked to specific contributions. However, this is not a  
29 silver bullet to fix gender inequalities. Even in journals with open peer review as standard policy,  
30 women represented only 28% of peer reviewers.<sup>17</sup> In addition, open peer review, if not properly  
31 implemented, may exacerbate inequities. Scientists, especially women, have witnessed a sharp rise  
32 in harassment, abuse (e.g., threatening e-mails, calls and comments on social media) and attacks on  
33 credibility during the COVID-19 pandemic.<sup>36</sup> Open peer review could fuel this further by publicly  
34 exposing reviewers names and the content of their appraisals. Concerns about deleterious  
35 professional and personal consequences of open peer review may discourage women to engage  
36 with the process. This, in turn, may result in increased difficulty in finding peer reviewers, and hence  
37  
38  
39  
40  
41  
42  
43  
44  
45  
46  
47  
48  
49  
50  
51  
52  
53  
54  
55  
56  
57  
58  
59  
60

1  
2  
3 strategies will need to be implemented to limit the risk to researchers who reveal their identity  
4 during a critical peer review.<sup>37</sup> Finally, all of us have a key role to play in promoting gender equality  
5 within our teams, working groups, institutions, by exposing unfair gender gaps and addressing overt  
6 or concealed gender discrimination and bias.<sup>38</sup>  
7  
8  
9

### 10 11 Limitations

12 This study has some limitations to acknowledge. First, we used a binary definition of gender of peer  
13 reviewers, which relied on predicting and assigning gender based on given names. Therefore, we did  
14 not account for non-binary gender or gender identities that did not match that of the given name  
15 and acknowledge that this method does not reflect the true diversity of the medical research  
16 community. Pronouns were used to determine gender of editors, and no they/them pronouns were  
17 present. However, it is still possible that non-binary gender identification was not reflected by the  
18 pronouns used on public websites. Ideally, future research should aim to investigate gender gaps  
19 based on self-identified gender, as has been done elsewhere.<sup>39</sup> Second, the genderizeR package  
20 could not assign a gender to all peer reviewers because the given name could not be classified as  
21 belonging to a woman or a man. However, we adopted a two-step approach to maximise the  
22 efficiency of the package, and hence the minimal percentage (<1%) of missing data is unlikely to  
23 have had a material impact on our key findings.<sup>14</sup> Third, we used journals from a single publishing  
24 family, which might not be representative of all medical journals. Results for two leading journals  
25 from different publishers, together with previous reports from other journal families suggest our  
26 findings might overestimate women's representation among peer reviewers of medical journals.<sup>15 16</sup>  
27 Fourth, it is possible our findings were affected by the COVID-19 pandemic. However, trends over  
28 time investigated for the BMJ suggested women's under-representation is a longstanding issue.  
29 Fifth, we cannot ascertain whether the observed correlation between women's representation  
30 among editors and peer reviewers is causal. Sixth, we could not estimate how many manuscripts  
31 were reviewed by each individual, and it is uncertain whether this would have swayed the gender  
32 distribution in favour of women or men.  
33  
34  
35  
36  
37  
38  
39  
40  
41  
42  
43  
44  
45  
46  
47  
48  
49

### 50 **Conclusions**

51 Women account for less than one in three peer reviewers in BMJ-PG journals with no evidence of  
52 improvement between 2009 and 2017 in the BMJ. No journal had more than 50% women reviewers.  
53 Better representation of women as editors was correlated with representation as peer reviewers,  
54 thus suggesting increasing women's representation as editors and peer reviewers may be one  
55 among many necessary steps in the pursuit of gender equity in editorial and publishing systems.  
56  
57  
58  
59  
60

**Ethics approval**

This study was based on publicly available data and hence ethical approval was not required.

**Transparency declaration**

ACPG affirms that the manuscript is an honest, accurate, and transparent account of the study being reported; that no important aspects of the study have been omitted; and that any discrepancies from the study as originally planned have been explained.

**Role of the funding source**

This study was not funded.

**Contributorship statement**

ACPG, SP, AV and MW designed this study. ACPG extracted and analysed the data and drafted the manuscript. All authors interpreted the findings and reviewed the manuscript.

**Competing interests**

MW is a consultant for Amgen, Kyowa Kirin and Freeline. No other competing interests to report.

**Funding**

This study was not funded.

**Data sharing statement**

All data are available upon request from the corresponding author.

## References

1. Lundine J, Bourgeault IL, Clark J, et al. The gendered system of academic publishing. *The Lancet* 2018;391(10132):1754-56. doi: 10.1016/S0140-6736(18)30950-4
2. Shen YA, Webster JM, Shoda Y, et al. Persistent Underrepresentation of Women's Science in High Profile Journals. *bioRxiv* 2018:275362. doi: 10.1101/275362
3. Hart KL, Perlis RH. Trends in Proportion of Women as Authors of Medical Journal Articles, 2008-2018. *JAMA Internal Medicine* 2019;179(9):1285-87. doi: 10.1001/jamainternmed.2019.0907
4. Lerchenmüller C, Lerchenmueller MJ, Sorenson O. Long-Term Analysis of Sex Differences in Prestigious Authorships in Cardiovascular Research Supported by the National Institutes of Health. *Circulation* 2018;137(8):880-82. doi: 10.1161/circulationaha.117.032325 [published Online First: 2018/02/21]
5. Rexrode KM. The gender gap in first authorship of research papers. *BMJ* 2016;352:i1130. doi: 10.1136/bmj.i1130
6. Pinho-Gomes AC, Vassallo A, Thompson K, et al. Representation of Women Among Editors in Chief of Leading Medical Journals. *JAMA Netw Open* 2021;4(9):e2123026. doi: 10.1001/jamanetworkopen.2021.23026 [published Online First: 2021/09/09]
7. Logan D. The importance of a gender-balanced editorial team, 2016.
8. Heidari S, Babor TF, De Castro P, et al. Sex and Gender Equity in Research: rationale for the SAGER guidelines and recommended use. *Research Integrity and Peer Review* 2016;1(1):2. doi: 10.1186/s41073-016-0007-6
9. Merriman R, Galizia I, Tanaka S, et al. The gender and geography of publishing: a review of sex/gender reporting and author representation in leading general medical and global health journals. *BMJ Global Health* 2021;6(5):e005672. doi: 10.1136/bmjgh-2021-005672
10. Fox CW, Duffy MA, Fairbairn DJ, et al. Gender diversity of editorial boards and gender differences in the peer review process at six journals of ecology and evolution. *Ecology and Evolution* 2019;9(24):13636-49. doi: <https://doi.org/10.1002/ece3.5794>
11. Mauleón E, Hillán L, Moreno L, et al. Assessing gender balance among journal authors and editorial board members. *Scientometrics* 2013;95(1):87-114. doi: 10.1007/s11192-012-0824-4
12. BMJ. Recognition for reviewers [Available from: <https://authors.bmj.com/for-reviewers/reviewer-recognition/> accessed 7 December 2021.

- 1  
2  
3 13. Genderize: Our Data [Available from: <https://genderize.io/our-data> accessed 7 December  
4 2021.  
5
- 6  
7 14. Wais K. Gender Prediction Methods Based on First Names with genderizeR. *The R Journal*  
8 2016;8:17-37. doi: 10.32614/RJ-2016-002  
9
- 10  
11 15. Steinberg JJ, Skae C, Sampson B. Gender gap, disparity, and inequality in peer review. *The*  
12 *Lancet* 2018;391(10140):2602-03. doi: 10.1016/S0140-6736(18)31141-3  
13
- 14  
15 16. Squazzoni F, Bravo G, Farjam M, et al. Peer review and gender bias: A study on 145  
16 scholarly journals. *Science Advances* 2021;7(2):eabd0299. doi:  
17 doi:10.1126/sciadv.abd0299  
18
- 19  
20 17. Helmer M, Schottdorf M, Neef A, et al. Gender bias in scholarly peer review. *Elife* 2017;6  
21 doi: 10.7554/eLife.21718 [published Online First: 2017/03/23]  
22
- 23  
24 18. Garisto D. Diversifying peer review by adding junior scientists. *Nature index* 2019.  
25 [https://www.natureindex.com/news-blog/diversifying-peer-review-by-adding-](https://www.natureindex.com/news-blog/diversifying-peer-review-by-adding-junior-scientists)  
26 [junior-scientists](https://www.natureindex.com/news-blog/diversifying-peer-review-by-adding-junior-scientists) (accessed 1 January 2022).  
27
- 28  
29 19. Abramo G, Aksnes DW, D'Angelo CA. Gender differences in research performance within  
30 and between countries: Italy vs Norway. *Journal of Informetrics* 2021;15(2):101144.  
31 doi: <https://doi.org/10.1016/j.joi.2021.101144>  
32
- 33  
34 20. Bozzon R, Murgia A, Poggio B, et al. Work–life interferences in the early stages of academic  
35 careers: The case of precarious researchers in Italy. *European Educational Research*  
36 *Journal* 2017;16(2-3):332-51. doi: 10.1177/1474904116669364  
37
- 38  
39 21. Gaio Santos G, Cabral-Cardoso C. Work-family culture in academia: a gendered view of  
40 work-family conflict and coping strategies. *Gender in Management: An International*  
41 *Journal* 2008;23(6):442-57. doi: 10.1108/17542410810897553  
42
- 43  
44 22. Guarino CM, Borden VMH. Faculty Service Loads and Gender: Are Women Taking Care of  
45 the Academic Family? *Research in Higher Education* 2017;58(6):672-94. doi:  
46 10.1007/s11162-017-9454-2  
47
- 48  
49 23. Squazzoni F, Bravo G, Grimaldo F, et al. Gender gap in journal submissions and peer review  
50 during the first wave of the COVID-19 pandemic. A study on 2329 Elsevier journals.  
51 *PLOS ONE* 2021;16(10):e0257919. doi: 10.1371/journal.pone.0257919  
52
- 53  
54 24. Nature. Science benefits from diversity. *Nature* 2018;558(7708):5. doi: 10.1038/d41586-  
55 018-05326-3 [published Online First: 2019/05/12]  
56
- 57  
58 25. Nielsen MW, Alegria S, Börjeson L, et al. Opinion: Gender diversity leads to better science.  
59 *Proc Natl Acad Sci U S A* 2017;114(8):1740-42. doi: 10.1073/pnas.1700616114  
60 [published Online First: 2017/02/24]



- 1  
2  
3  
4  
5  
6  
7  
8  
9  
10  
11  
12  
13  
14  
15  
16  
17  
18  
19  
20  
21  
22  
23  
24  
25  
26  
27  
28  
29  
30  
31  
32  
33  
34  
35  
36  
37  
38  
39  
40  
41  
42  
43  
44  
45  
46  
47  
48  
49  
50  
51  
52  
53  
54  
55  
56  
57  
58  
59  
60
26. Hawkes S, Haseen F, Aounallah-Skhiri H. Measurement and meaning: reporting sex in health research. *The Lancet* 2019;393(10171):497-99. doi: 10.1016/S0140-6736(19)30283-1
  27. Recognizing the involvement of early-career researchers in peer review. *Nature Reviews Endocrinology* 2020;16(10):535-35. doi: 10.1038/s41574-020-0404-2
  28. Reviewing as a career milestone: a discussion on the importance of including trainees in the peer review process. *Commun Biol* 2021;4(1):1126. doi: 10.1038/s42003-021-02645-6 [published Online First: 2021/09/26]
  29. Martínez-López JI, Barrón-González S, Martínez López A. Which Are the Tools Available for Scholars? A Review of Assisting Software for Authors during Peer Reviewing Process. *Publications* 2019;7(3):59.
  30. Springer Nature. Reviewer Finder [Available from: <https://www.springernature.com/gp/editors/resources-tools/reviewer-finder> accessed 7 December 2021].
  31. Locke C. Why Gender Bias Still Occurs And What We Can Do About It: Forbes, 2019.
  32. García-González J, Forcén P, Jimenez-Sanchez M. Men and women differ in their perception of gender bias in research institutions. *PLOS ONE* 2019;14(12):e0225763. doi: 10.1371/journal.pone.0225763
  33. Malkinson TS, Terhune DB, Kollamkulam M, et al. Gender Imbalance in the Editorial Activities of a Researcher-led Journal. *bioRxiv* 2021:2021.11.09.467796. doi: 10.1101/2021.11.09.467796
  34. Onyeador IN, Hudson S-kTJ, Lewis NA. Moving Beyond Implicit Bias Training: Policy Insights for Increasing Organizational Diversity. *Policy Insights from the Behavioral and Brain Sciences* 2021;8(1):19-26. doi: 10.1177/2372732220983840
  35. Bezrukova K, Spell CS, Perry JL, et al. A meta-analytical integration of over 40 years of research on diversity training evaluation. *Psychol Bull* 2016;142(11):1227-74. doi: 10.1037/bul0000067 [published Online First: 2016/10/25]
  36. Nogrady B. 'I hope you die': how the COVID pandemic unleashed attacks on scientists. *Nature* 2021;598(7880):250-53. doi: 10.1038/d41586-021-02741-x [published Online First: 2021/10/15]
  37. Ross-Hellauer T, Görögh E. Guidelines for open peer review implementation. *Research Integrity and Peer Review* 2019;4(1):4. doi: 10.1186/s41073-019-0063-9
  38. Asmal L, Lamp G, Tan EJ. Considerations for improving diversity, equity and inclusivity within research designs and teams. *Psychiatry Research* 2022;307:114295. doi: <https://doi.org/10.1016/j.psychres.2021.114295>

- 1  
2  
3 39. Salazar JW, Claytor JD, Habib AR, et al. Gender, Race, Ethnicity, and Sexual Orientation of  
4 Editors at Leading Medical and Scientific Journals: A Cross-sectional Survey. *JAMA*  
5 *Internal Medicine* 2021;181(9):1248-51. doi: 10.1001/jamainternmed.2021.2363  
6  
7  
8  
9  
10  
11  
12  
13  
14  
15  
16  
17  
18  
19  
20  
21  
22  
23  
24  
25  
26  
27  
28  
29  
30  
31  
32  
33  
34  
35  
36  
37  
38  
39  
40  
41  
42  
43  
44  
45  
46  
47  
48  
49  
50  
51  
52  
53  
54  
55  
56  
57  
58  
59  
60

For peer review only

**Table 1: Representation of women among peer reviewers and editors of medical journals**

| <b>BMJ journals</b>                                      | <b>No. of reviewers</b> | <b>% Women</b> | <b>% Missing</b> | <b>No. of editors</b> | <b>% Women</b> | <b>Gender of EIC</b> | <b>Citescore</b> | <b>Impact factor</b> |
|----------------------------------------------------------|-------------------------|----------------|------------------|-----------------------|----------------|----------------------|------------------|----------------------|
| <i>Annals of the Rheumatic Diseases</i>                  | 529                     | 23.1           | 0.4              | 12                    | 25.0           | Man                  | 28.7             | 19.1                 |
| <i>BMJ Case Reports</i>                                  | 7179                    | 23.1           | 1.1              | 11                    | 27.3           | Woman                | NA               | NA                   |
| <i>BMJ Global Health</i>                                 | 1325                    | 41.1           | 0.8              | 16                    | 25.0           | Man                  | 5.5              | 5.6                  |
| <i>BMJ Health &amp; Care Informatics</i>                 | 133                     | 34.1           | 0.8              | 17                    | 35.3           | Man                  | 1.9              | NA                   |
| <i>BMJ Leader</i>                                        | 162                     | 47.8           | 1.9              | 14                    | 35.7           | Man                  | 1                | NA                   |
| <i>BMJ Neurology Open</i>                                | 85                      | 32.9           | 0.0              | 8                     | 25.0           | Man                  | NA               | NA                   |
| <i>BMJ Open</i>                                          | 13041                   | 36.4           | 1.3              | 14                    | 50.0           | Man                  | 3.7              | 2.7                  |
| <i>BMJ Open Diabetes Research &amp; Care</i>             | 1038                    | 30.8           | 0.9              | 8                     | 0.0            | Man                  | 3.3              | 3.4                  |
| <i>BMJ Open Ophthalmology</i>                            | 278                     | 30.1           | 0.7              | 29                    | 34.5           | Man                  | 2.5              | NA                   |
| <i>BMJ Open Quality</i>                                  | 42                      | 39.0           | 2.4              | 8                     | 87.5           | Woman                | 1.1              | NA                   |
| <i>BMJ Open Respiratory Research</i>                     | 340                     | 24.6           | 1.8              | 3                     | 0.0            | Men (2)              | 4                | NA                   |
| <i>BMJ Open Science</i>                                  | 43                      | 37.2           | 0.0              | 18                    | 44.4           | Woman                | NA               | NA                   |
| <i>BMJ Open Sport &amp; Exercise Medicine</i>            | 309                     | 33.4           | 0.3              | 39                    | 33.3           | Man                  | 3.5              | NA                   |
| <i>BMJ Paediatrics Open</i>                              | 356                     | 35.0           | 0.6              | 26                    | 46.2           | Man                  | 2.5              | NA                   |
| <i>BMJ Simulation &amp; Technology Enhanced Learning</i> | 180                     | 44.4           | 0.0              | 12                    | 58.3           | Woman                | 1.4              | NA                   |
| <i>BMJ Supportive &amp; Palliative Care</i>              | 417                     | 48.3           | 0.7              | 29                    | 34.5           | Men (2)              | 4.8              | 3.6                  |
| <i>British Journal of Ophthalmology</i>                  | 1113                    | 24.5           | 0.3              | 3                     | 0.0            | Man                  | 7.3              | 4.6                  |
| <i>British Journal of Sports Medicine</i>                | 693                     | 28.5           | 0.1              | 15                    | 40.0           | Man                  | 19.2             | 13.8                 |

|                                                                  |      |      |     |    |      |         |      |      |
|------------------------------------------------------------------|------|------|-----|----|------|---------|------|------|
| <b><i>Drug and Therapeutics Bulletin</i></b>                     | 64   | 31.3 | 0.0 | 12 | 33.3 | Man     | NA   | NA   |
| <b><i>Emergency Medicine Journal</i></b>                         | 767  | 26.5 | 0.0 | 6  | 50.0 | Woman   | 3.4  | 2.8  |
| <b><i>European Journal of Hospital Pharmacy</i></b>              | 203  | 40.5 | 1.5 | 16 | 37.5 | Man     | 1.6  | 1.7  |
| <b><i>Evidence-Based Medicine</i></b>                            | 271  | 33.3 | 1.5 | 11 | 63.6 | Man     | 3.2  | NA   |
| <b><i>Evidence-Based Mental Health</i></b>                       | 64   | 35.9 | 1.6 | 12 | 25.0 | Man     | 8.6  | 8.5  |
| <b><i>Frontline Gastroenterology</i></b>                         | 220  | 19.5 | 0.0 | 11 | 9.1  | Man     | 3.2  | NA   |
| <b><i>General Psychiatry</i></b>                                 | 167  | 25.7 | 0.0 | 10 | 10.0 | Man     | 4.5  | NA   |
| <b><i>Gut</i></b>                                                | 1307 | 20.2 | 0.8 | 17 | 5.9  | Man     | 35.6 | 23.1 |
| <b><i>Heart</i></b>                                              | 970  | 23.0 | 0.4 | 17 | 23.5 | Woman   | 9    | 6.0  |
| <b><i>Injury Prevention</i></b>                                  | 282  | 38.6 | 1.8 | 7  | 57.1 | Woman   | 3.7  | 2.4  |
| <b><i>Integrated Healthcare Journal</i></b>                      | 35   | 37.1 | 0.0 | 2  | 0.0  | Man     | NA   | NA   |
| <b><i>Journal of Clinical Pathology</i></b>                      | 441  | 30.9 | 1.8 | 10 | 30.0 | Man     | 5.3  | 3.4  |
| <b><i>Journal of Epidemiology &amp; Community Health</i></b>     | 548  | 40.7 | 1.5 | 22 | 27.3 | Men (2) | 6.3  | 3.7  |
| <b><i>Journal of Investigative Medicine</i></b>                  | 366  | 24.9 | 0.3 | 27 | 18.5 | Man     | 3.9  | 2.9  |
| <b><i>Journal of Medical Ethics</i></b>                          | 726  | 38.7 | 0.4 | 8  | 62.5 | Man     | 4    | 2.9  |
| <b><i>Journal of Medical Genetics</i></b>                        | 504  | 38.3 | 0.0 | 6  | 33.3 | Man     | 9.7  | 6.3  |
| <b><i>Journal of Neurointerventional Surgery</i></b>             | 788  | 11.2 | 0.5 | 16 | 12.5 | Man     | 8.2  | 5.8  |
| <b><i>Journal of Neurology, Neurosurgery, and Psychiatry</i></b> | 1126 | 19.1 | 0.7 | 8  | 12.5 | Man     | 13.5 | 10.3 |
| <b><i>Medical Humanities</i></b>                                 | 198  | 50.5 | 1.0 | 5  | 60.0 | Woman   | 1.5  | NA   |
| <b><i>Occupational and Environmental Medicine</i></b>            | 440  | 40.6 | 0.0 | 15 | 33.3 | Man     | 6.8  | 4.4  |
| <b><i>Open Heart</i></b>                                         | 365  | 19.2 | 0.3 | 13 | 23.1 | Man     | 3.1  | NA   |

|                                               |       |      |     |     |      |         |      |      |
|-----------------------------------------------|-------|------|-----|-----|------|---------|------|------|
| <i>Postgraduate Medical Journal</i>           | 429   | 24.9 | 1.6 | 12  | 16.7 | Man     | 3.3  | 2.4  |
| <i>Practical Neurology</i>                    | 118   | 16.2 | 0.8 | 6   | 0.0  | Men (2) | 3.1  | NA   |
| <i>Regional Anaesthesia and Pain Medicine</i> | 405   | 21.4 | 1.0 | 12  | 8.3  | Men (2) | 7.9  | 6.3  |
| <i>RMD Open</i>                               | 424   | 32.9 | 1.2 | 8   | 50.0 | Man     | 6.1  | 5.1  |
| <i>The Journal of ISAKSOS Medicine</i>        | 165   | 8.0  | 1.2 | 3   | 33.3 | Man     | NA   | NA   |
| <i>Tobacco Control</i>                        | 519   | 40.9 | 1.2 | 8   | 75.0 | Woman   | 10.9 | 6.6  |
| <i>Trauma Surgery &amp; Acute Care Open</i>   | 140   | 26.1 | 1.4 | 10  | 50.0 | Man     | 1.3  | NA   |
| <i>The BMJ</i>                                | 3224  | 29.5 | 0.8 | 15  | 80.0 | Woman   | 6.9  | 38.9 |
| <b>Overall</b>                                | 42539 | 30.2 | 0.9 | 555 | 33.4 | 19.2%   |      |      |
| <b>External comparators</b>                   |       |      |     |     |      |         |      |      |
| <i>NEJM</i>                                   | 695   | 18.9 | 0.3 | 19  | 36.8 | Man     | 80.6 | 91.2 |
| <i>JAMA</i>                                   | 2880  | 28.1 | 0.2 | 32  | 31.3 | Man     | NA   | 56.3 |

All data refer to 2020 apart from data for the BMJ, which are from 2017 as this was the last year available.

EIC, Editor-in-chief; NA, not available

### Figure legends

#### Figure 1: Representation of women as peer reviewers and editors according to the gender of the editor-in-chief

Points represent individual journals and size is proportional to the total number of peer reviewers. The colour of the points represents the gender of the editor-in-chief (turquoise for women and coral for men). Black line represents linear regression line. Spearman correlation coefficient was 0.590.

#### Figure 2: Trends in representation of women as peer reviewers

The dots represent the percentage of women as peer reviewers for each available year and journal. The colours of the lines represent different journals: BMJ, NEJM and JAMA.

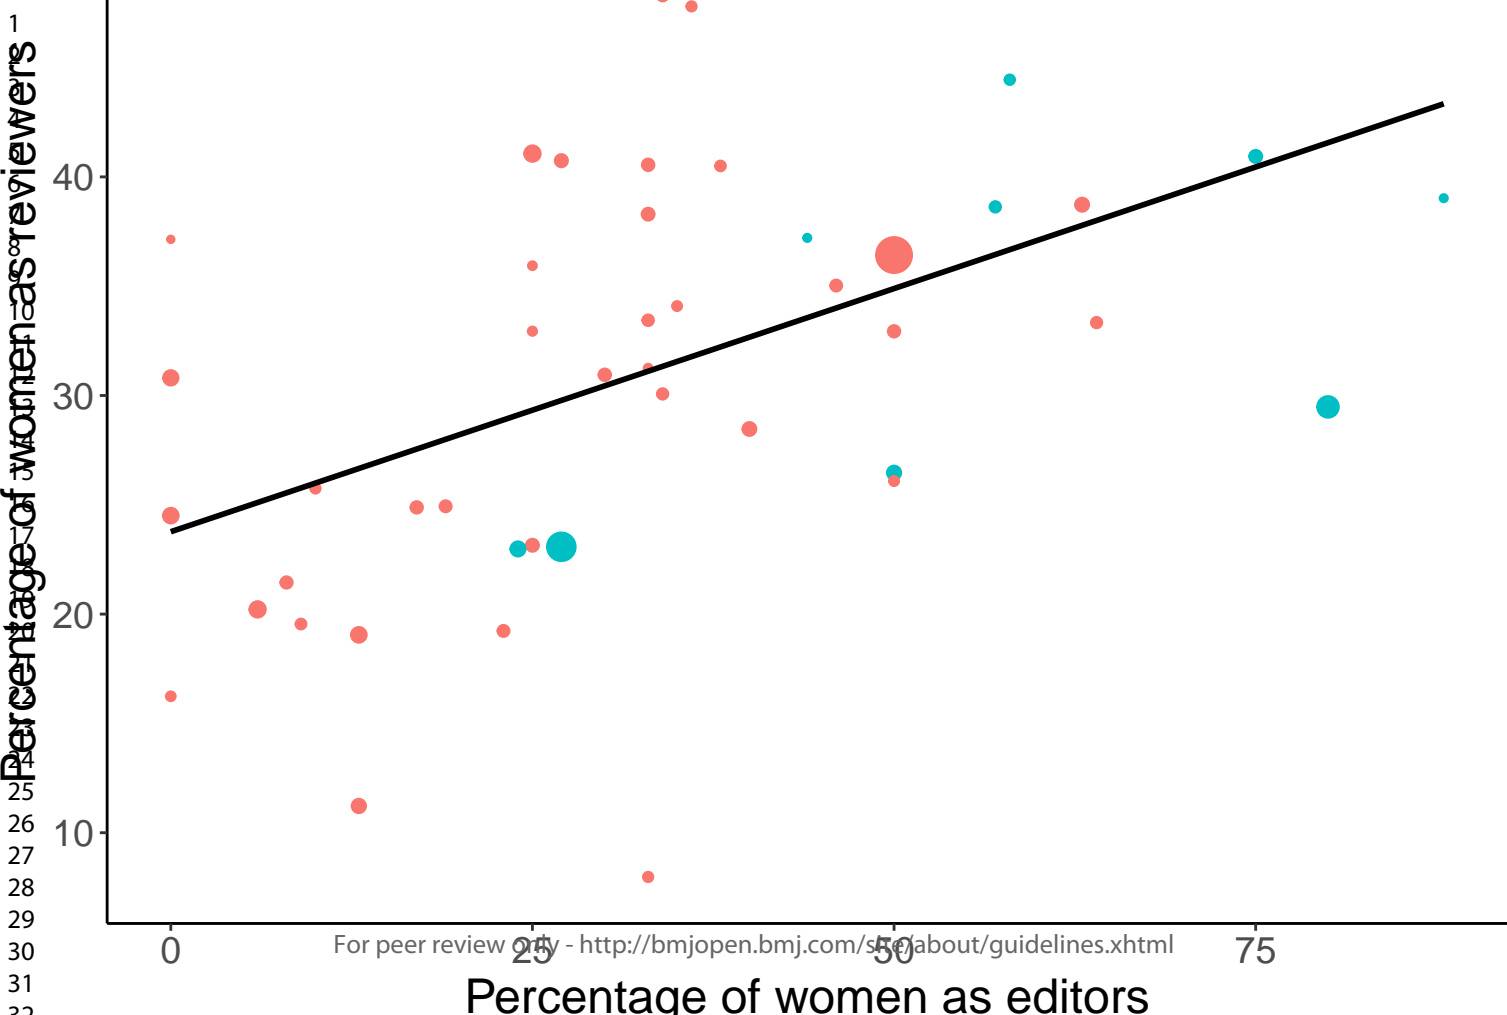

25  
26  
27  
28  
29  
30  
31  
32

For peer review only - <http://bmjopen.bmj.com/submit/about/guidelines.xhtml>

BMJ Open

Percentage of women as peer reviewers

Journal  
BMJ  
JAMA  
NEJM

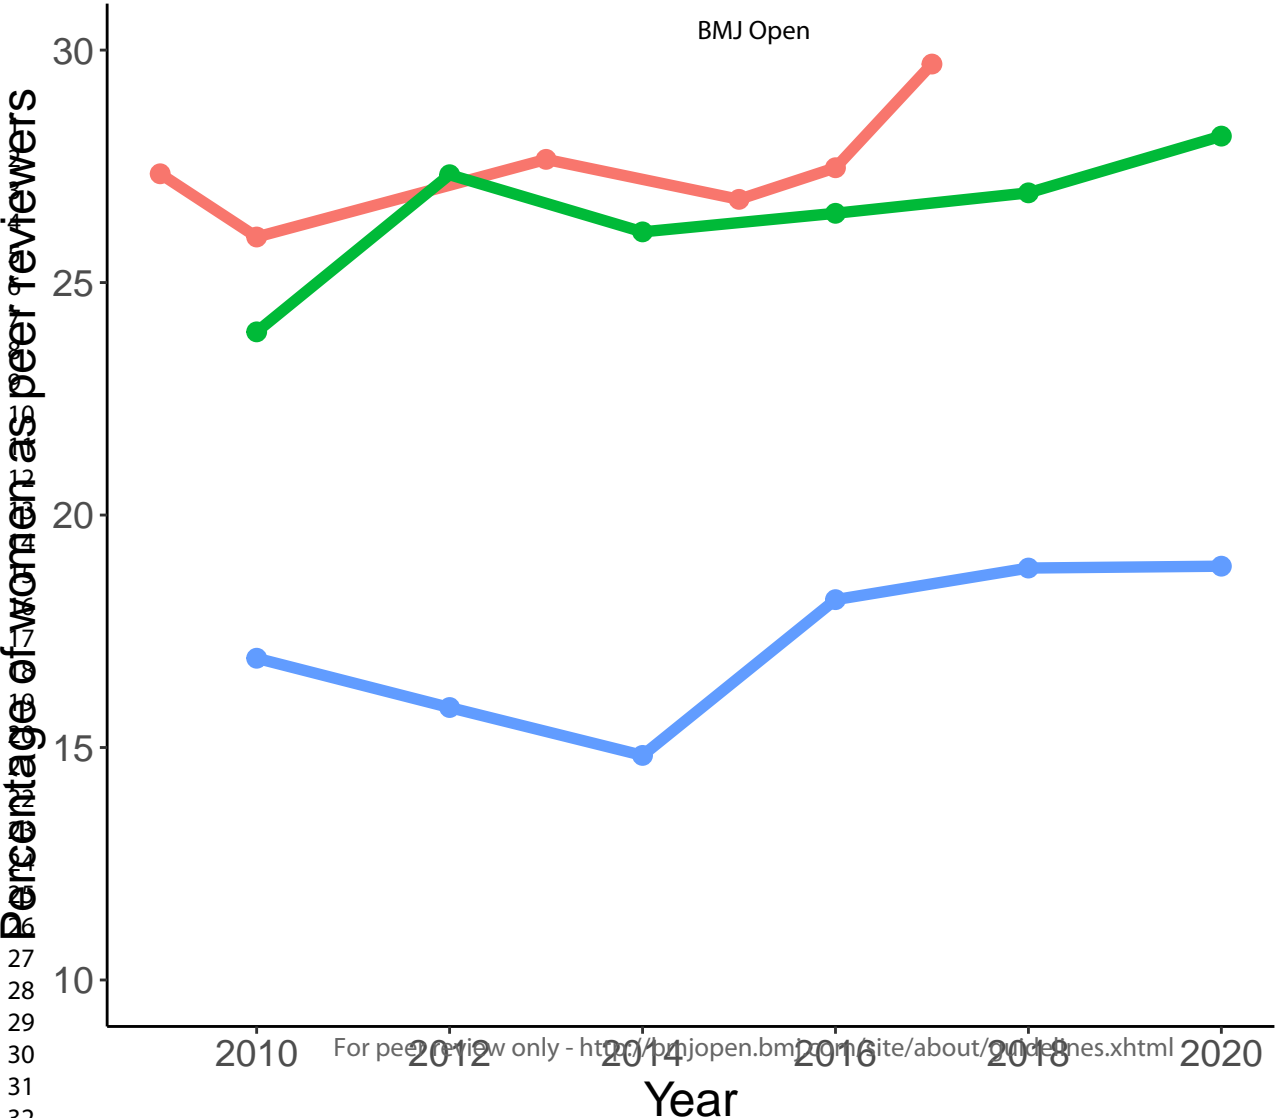

27  
28  
29  
30  
31  
32

For peer review only - <https://bmjopen.bmj.com/site/about/guidelines.xhtml>



## Supplementary data

Table S1: List of journals included and excluded due to lack of data on reviewers

| <b>BMJ journals</b>                                           | <b>Reviewers available</b> |
|---------------------------------------------------------------|----------------------------|
| Acupuncture in Medicine                                       | No                         |
| Annals of the Rheumatic Diseases                              | Yes                        |
| Archives of Disease in Childhood                              | No                         |
| Archives of Disease in Childhood Education & Practice Edition | No                         |
| Archives of Disease in Childhood Fetal & Neonatal Edition     | No                         |
| BMJ Case Reports                                              | Yes                        |
| BMJ ESMO Open                                                 | No                         |
| BMJ Global Health                                             | Yes                        |
| BMJ Health & Care Informatics                                 | Yes                        |
| BMJ Innovations                                               | No                         |
| BMJ Leader                                                    | Yes                        |
| BMJ Medicine                                                  | No                         |
| BMJ Neurology Open                                            | Yes                        |
| BMJ Nutrition, Prevention & Health                            | No                         |
| BMJ Open                                                      | Yes                        |
| BMJ Open Diabetes Research & Care                             | Yes                        |
| BMJ Open Gastroenterology                                     | No                         |
| BMJ Open Ophthalmology                                        | Yes                        |
| BMJ Open Quality                                              | Yes                        |
| BMJ Open Respiratory Research                                 | Yes                        |
| BMJ Open Science                                              | Yes                        |
| BMJ Open Sport & Exercise Medicine                            | Yes                        |
| BMJ Paediatrics Open                                          | Yes                        |
| BMJ Quality & Safety                                          | No                         |
| BMJ Sexual & Reproductive Health                              | No                         |
| BMJ Simulation & Technology Enhanced Learning                 | Yes                        |
| BMJ Supportive & Palliative Care                              | Yes                        |
| BMJ Surgery, Interventions & Health Technologies              | No                         |
| British Journal of Ophthalmology                              | Yes                        |
| British Journal of Sports Medicine                            | Yes                        |
| Considerations in Medicine                                    | No                         |
| Drug and Therapeutics Bulletin                                | Yes                        |
| Emergency Medicine Journal                                    | Yes                        |
| European Journal of Hospital Pharmacy                         | Yes                        |
| Evidence-Based Medicine                                       | Yes                        |
| Evidence-Based Mental Health                                  | Yes                        |
| Evidence-Based Nursing                                        | No                         |

|    |                                                                                                                    |              |
|----|--------------------------------------------------------------------------------------------------------------------|--------------|
| 1  |                                                                                                                    |              |
| 2  |                                                                                                                    |              |
| 3  | <b>Family Medicine and Community Health</b>                                                                        | No           |
| 4  | <b>Frontline Gastroenterology</b>                                                                                  | Yes          |
| 5  | <b>General Psychiatry</b>                                                                                          | Yes          |
| 6  | <b>Gut</b>                                                                                                         | Yes          |
| 7  | <b>Heart</b>                                                                                                       | Yes          |
| 8  | <b>Heart Asia</b>                                                                                                  | No           |
| 9  | <b>In Practice</b>                                                                                                 | No           |
| 10 | <b>Injury Prevention</b>                                                                                           | Yes          |
| 11 | <b>Integrated Healthcare Journal</b>                                                                               | Yes          |
| 12 | <b>International Journal of Gynecological Cancer</b>                                                               | No           |
| 13 | <b>Journal for ImmunoTherapy of Cancer</b>                                                                         | No           |
| 14 | <b>Journal of Clinical Pathology</b>                                                                               | Yes          |
| 15 | <b>Journal of Epidemiology &amp; Community Health</b>                                                              | Yes          |
| 16 | <b>Journal of Family Planning and Reproductive Health Care</b>                                                     | No           |
| 17 | <b>Journal of Investigative Medicine</b>                                                                           | Yes          |
| 18 | <b>Journal of Medical Ethics</b>                                                                                   | Yes          |
| 19 | <b>Journal of Medical Genetics</b>                                                                                 | Yes          |
| 20 | <b>Journal of NeuroInterventional Surgery</b>                                                                      | Yes          |
| 21 | <b>Journal of Neurology, Neurosurgery, and Psychiatry</b>                                                          | Yes          |
| 22 | <b>Journal of the Royal Army Corps</b>                                                                             | No           |
| 23 | <b>Lupus Science &amp; Medicine</b>                                                                                | No           |
| 24 | <b>Medical Humanities</b>                                                                                          | Yes          |
| 25 | <b>Occupational and Environmental Medicine</b>                                                                     | Yes          |
| 26 | <b>Open Heart</b>                                                                                                  | Yes          |
| 27 | <b>Postgraduate Medical Journal</b>                                                                                | Yes          |
| 28 | <b>Practical Neurology</b>                                                                                         | Yes          |
| 29 | <b>Regional Anaesthesia and Pain Medicine</b>                                                                      | Yes          |
| 30 | <b>RMD Open: Rheumatic and Musculoskeletal disorders</b>                                                           | Yes          |
| 31 | <b>Sexually Transmitted Infections</b>                                                                             | No           |
| 32 | <b>Stroke and Vascular Neurology (SVN)</b>                                                                         | No           |
| 33 | <b>Student BMJ</b>                                                                                                 | No           |
| 34 | <b>The Journal of International Society of Arthroscopy, Knee Surgery and Orthopaedic Sports (ISAKSOS) Medicine</b> | Yes          |
| 35 | <b>Thorax</b>                                                                                                      | No           |
| 36 | <b>Tobacco Control</b>                                                                                             | Yes          |
| 37 | <b>Trauma Surgery &amp; Acute Care Open</b>                                                                        | Yes          |
| 38 | <b>World Journal of Pediatric Surgery</b>                                                                          | No           |
| 39 | <b>BMJ</b>                                                                                                         | 2009 to 2017 |
| 40 | <b>NEJM</b>                                                                                                        | Yes          |
| 41 | <b>JAMA</b>                                                                                                        | Yes          |
| 42 |                                                                                                                    |              |
| 43 |                                                                                                                    |              |
| 44 |                                                                                                                    |              |
| 45 |                                                                                                                    |              |
| 46 |                                                                                                                    |              |
| 47 |                                                                                                                    |              |
| 48 |                                                                                                                    |              |
| 49 |                                                                                                                    |              |
| 50 |                                                                                                                    |              |
| 51 |                                                                                                                    |              |
| 52 |                                                                                                                    |              |
| 53 |                                                                                                                    |              |
| 54 |                                                                                                                    |              |
| 55 |                                                                                                                    |              |
| 56 |                                                                                                                    |              |
| 57 |                                                                                                                    |              |
| 58 |                                                                                                                    |              |
| 59 |                                                                                                                    |              |
| 60 |                                                                                                                    |              |

**Table S2: Representation of women as peer reviewer in the British Medical Journal, New England Journal of Medicine and Journal of the American Medical Association**

| Year                                               | Reviewers | % Women | % Missing |
|----------------------------------------------------|-----------|---------|-----------|
| <b>British Medical Journal</b>                     |           |         |           |
| 2009                                               | 2576      | 27.3    | 0.0       |
| 2010                                               | 2711      | 26.0    | 0.0       |
| 2013                                               | 1876      | 27.6    | 0.9       |
| 2014                                               | 3650      | 26.8    | 0.7       |
| 2015                                               | 3354      | 27.5    | 0.9       |
| 2016                                               | 3136      | 29.7    | 0.7       |
| 2017                                               | 2880      | 29.5    | 0.8       |
| <b>New England Journal of Medicine</b>             |           |         |           |
| 2010                                               | 858       | 16.9    | 0.1       |
| 2012                                               | 864       | 15.9    | 0.0       |
| 2014                                               | 654       | 14.8    | 0.0       |
| 2016                                               | 629       | 18.2    | 0.3       |
| 2018                                               | 578       | 18.9    | 0.0       |
| 2020                                               | 695       | 18.9    | 0.3       |
| <b>Journal of the American Medical Association</b> |           |         |           |
| 2010                                               | 3419      | 23.9    | 0.6       |
| 2012                                               | 3791      | 27.3    | 1.5       |
| 2014                                               | 3819      | 26.1    | 0.2       |
| 2016                                               | 2925      | 26.5    | 0.2       |
| 2018                                               | 2710      | 26.9    | 0.1       |
| 2020                                               | 2880      | 28.1    | 0.2       |

Figure S1: Percentage of women as peer reviewers according to impact factor and Citescore of journals

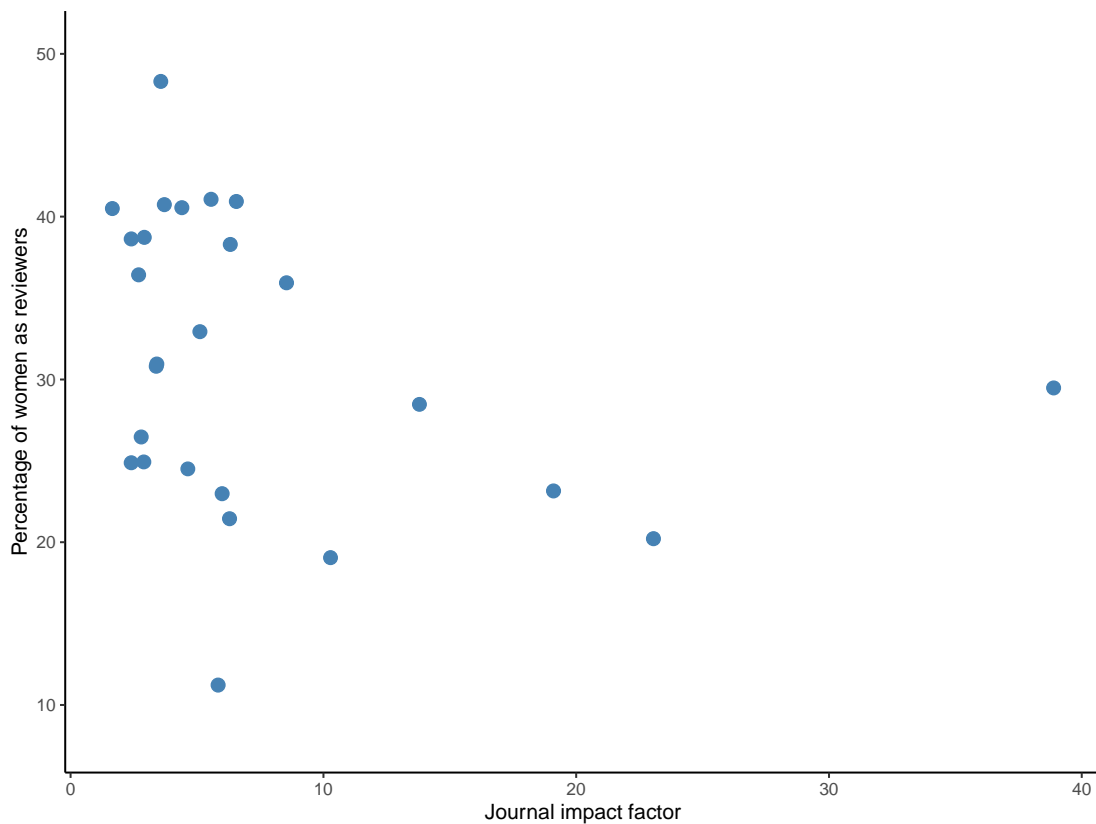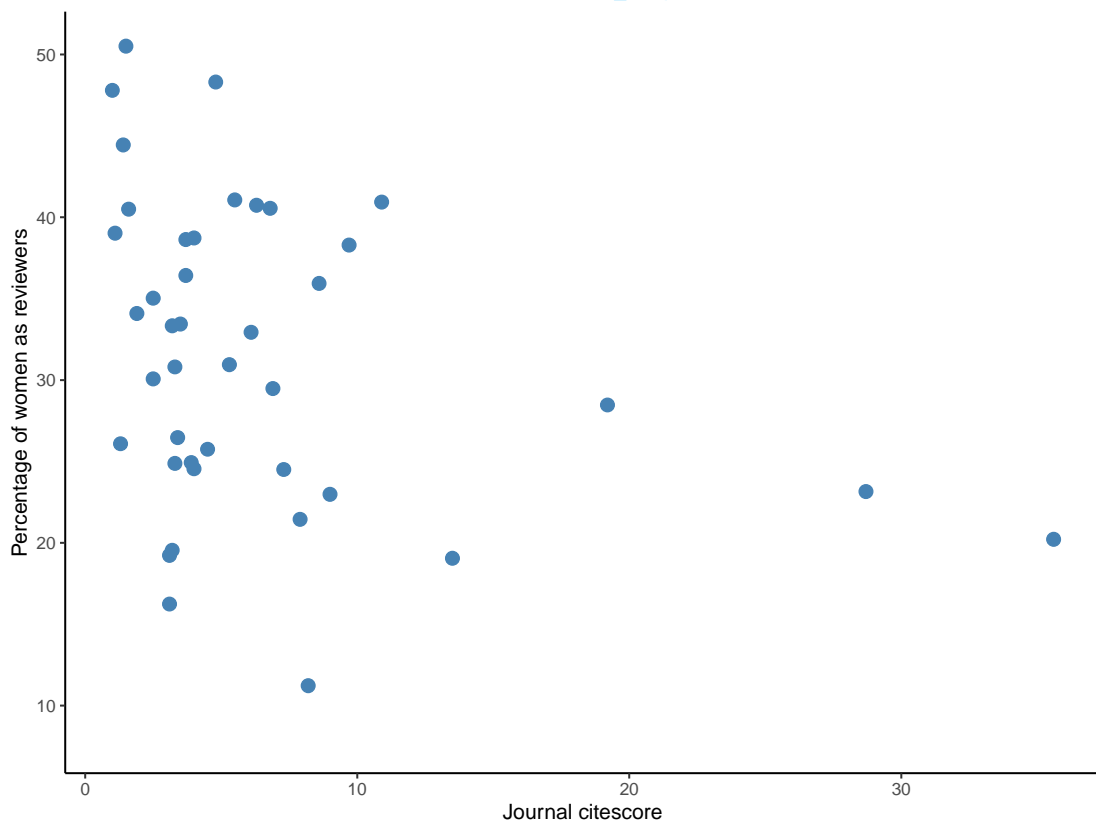

Impact factor was not available for 21 journals and Citescore was not available for 6 journals.
