# Supplementary material for: Cross-sectional study of the relationship between women’s representation among editors and peer reviewers in journals of the British Medical Journal Publishing Group
Source: PubMed Central journal article supplement — BMJ Open. 2022 May 11;12(5):e061054. doi: 10.1136/bmjopen-2022-061054 (PMC9109081; doi:10.1136/bmjopen-2022-061054), 2022-05-11
Supplement: bmjopen-2022-061054supp001.pdf [file bmjopen-2022-061054supp001.pdf]

## Supplementary data

Table S1: List of journals included and excluded due to lack of data on reviewers

| <b>BMJ journals</b>                                           | <b>Reviewers available</b> |
|---------------------------------------------------------------|----------------------------|
| Acupuncture in Medicine                                       | No                         |
| Annals of the Rheumatic Diseases                              | Yes                        |
| Archives of Disease in Childhood                              | No                         |
| Archives of Disease in Childhood Education & Practice Edition | No                         |
| Archives of Disease in Childhood Fetal & Neonatal Edition     | No                         |
| BMJ Case Reports                                              | Yes                        |
| BMJ ESMO Open                                                 | No                         |
| BMJ Global Health                                             | Yes                        |
| BMJ Health & Care Informatics                                 | Yes                        |
| BMJ Innovations                                               | No                         |
| BMJ Leader                                                    | Yes                        |
| BMJ Medicine                                                  | No                         |
| BMJ Neurology Open                                            | Yes                        |
| BMJ Nutrition, Prevention & Health                            | No                         |
| BMJ Open                                                      | Yes                        |
| BMJ Open Diabetes Research & Care                             | Yes                        |
| BMJ Open Gastroenterology                                     | No                         |
| BMJ Open Ophthalmology                                        | Yes                        |
| BMJ Open Quality                                              | Yes                        |
| BMJ Open Respiratory Research                                 | Yes                        |
| BMJ Open Science                                              | Yes                        |
| BMJ Open Sport & Exercise Medicine                            | Yes                        |
| BMJ Paediatrics Open                                          | Yes                        |
| BMJ Quality & Safety                                          | No                         |
| BMJ Sexual & Reproductive Health                              | No                         |
| BMJ Simulation & Technology Enhanced Learning                 | Yes                        |
| BMJ Supportive & Palliative Care                              | Yes                        |
| BMJ Surgery, Interventions & Health Technologies              | No                         |
| British Journal of Ophthalmology                              | Yes                        |
| British Journal of Sports Medicine                            | Yes                        |
| Considerations in Medicine                                    | No                         |
| Drug and Therapeutics Bulletin                                | Yes                        |
| Emergency Medicine Journal                                    | Yes                        |
| European Journal of Hospital Pharmacy                         | Yes                        |
| Evidence-Based Medicine                                       | Yes                        |
| Evidence-Based Mental Health                                  | Yes                        |
| Evidence-Based Nursing                                        | No                         |

|                                                                                                                    |              |
|--------------------------------------------------------------------------------------------------------------------|--------------|
| <b>Family Medicine and Community Health</b>                                                                        | No           |
| <b>Frontline Gastroenterology</b>                                                                                  | Yes          |
| <b>General Psychiatry</b>                                                                                          | Yes          |
| <b>Gut</b>                                                                                                         | Yes          |
| <b>Heart</b>                                                                                                       | Yes          |
| <b>Heart Asia</b>                                                                                                  | No           |
| <b>In Practice</b>                                                                                                 | No           |
| <b>Injury Prevention</b>                                                                                           | Yes          |
| <b>Integrated Healthcare Journal</b>                                                                               | Yes          |
| <b>International Journal of Gynecological Cancer</b>                                                               | No           |
| <b>Journal for ImmunoTherapy of Cancer</b>                                                                         | No           |
| <b>Journal of Clinical Pathology</b>                                                                               | Yes          |
| <b>Journal of Epidemiology &amp; Community Health</b>                                                              | Yes          |
| <b>Journal of Family Planning and Reproductive Health Care</b>                                                     | No           |
| <b>Journal of Investigative Medicine</b>                                                                           | Yes          |
| <b>Journal of Medical Ethics</b>                                                                                   | Yes          |
| <b>Journal of Medical Genetics</b>                                                                                 | Yes          |
| <b>Journal of NeuroInterventional Surgery</b>                                                                      | Yes          |
| <b>Journal of Neurology, Neurosurgery, and Psychiatry</b>                                                          | Yes          |
| <b>Journal of the Royal Army Corps</b>                                                                             | No           |
| <b>Lupus Science &amp; Medicine</b>                                                                                | No           |
| <b>Medical Humanities</b>                                                                                          | Yes          |
| <b>Occupational and Environmental Medicine</b>                                                                     | Yes          |
| <b>Open Heart</b>                                                                                                  | Yes          |
| <b>Postgraduate Medical Journal</b>                                                                                | Yes          |
| <b>Practical Neurology</b>                                                                                         | Yes          |
| <b>Regional Anaesthesia and Pain Medicine</b>                                                                      | Yes          |
| <b>RMD Open: Rheumatic and Musculoskeletal disorders</b>                                                           | Yes          |
| <b>Sexually Transmitted Infections</b>                                                                             | No           |
| <b>Stroke and Vascular Neurology (SVN)</b>                                                                         | No           |
| <b>Student BMJ</b>                                                                                                 | No           |
| <b>The Journal of International Society of Arthroscopy, Knee Surgery and Orthopaedic Sports (ISAKSOS) Medicine</b> | Yes          |
| <b>Thorax</b>                                                                                                      | No           |
| <b>Tobacco Control</b>                                                                                             | Yes          |
| <b>Trauma Surgery &amp; Acute Care Open</b>                                                                        | Yes          |
| <b>World Journal of Pediatric Surgery</b>                                                                          | No           |
| <b>BMJ</b>                                                                                                         | 2009 to 2017 |
| <b>NEJM</b>                                                                                                        | Yes          |
| <b>JAMA</b>                                                                                                        | Yes          |

**Table S2: Representation of women as peer reviewer in the British Medical Journal, New England Journal of Medicine and Journal of the American Medical Association**

| Year                                               | Reviewers | % Women | % Missing |
|----------------------------------------------------|-----------|---------|-----------|
| <b>British Medical Journal</b>                     |           |         |           |
| 2009                                               | 2576      | 27.3    | 0.0       |
| 2010                                               | 2711      | 26.0    | 0.0       |
| 2013                                               | 1876      | 27.6    | 0.9       |
| 2014                                               | 3650      | 26.8    | 0.7       |
| 2015                                               | 3354      | 27.5    | 0.9       |
| 2016                                               | 3136      | 29.7    | 0.7       |
| 2017                                               | 2880      | 29.5    | 0.8       |
| <b>New England Journal of Medicine</b>             |           |         |           |
| 2010                                               | 858       | 16.9    | 0.1       |
| 2012                                               | 864       | 15.9    | 0.0       |
| 2014                                               | 654       | 14.8    | 0.0       |
| 2016                                               | 629       | 18.2    | 0.3       |
| 2018                                               | 578       | 18.9    | 0.0       |
| 2020                                               | 695       | 18.9    | 0.3       |
| <b>Journal of the American Medical Association</b> |           |         |           |
| 2010                                               | 3419      | 23.9    | 0.6       |
| 2012                                               | 3791      | 27.3    | 1.5       |
| 2014                                               | 3819      | 26.1    | 0.2       |
| 2016                                               | 2925      | 26.5    | 0.2       |
| 2018                                               | 2710      | 26.9    | 0.1       |
| 2020                                               | 2880      | 28.1    | 0.2       |

**Figure S1: Percentage of women as peer reviewers according to impact factor and Citescore of journals**

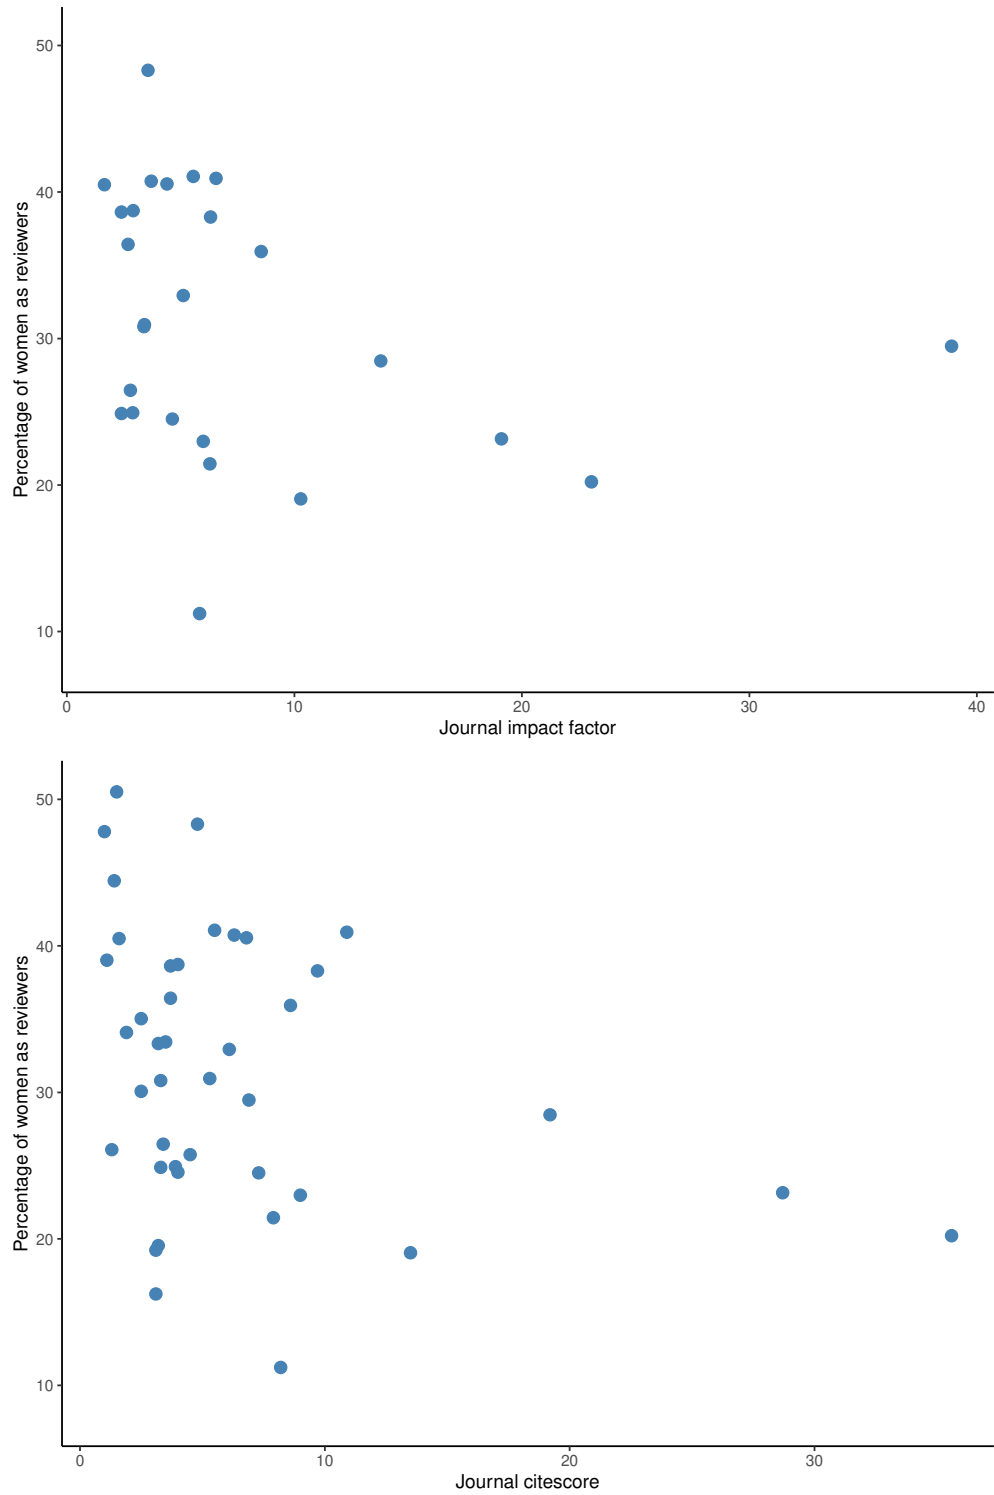

Impact factor was not available for 21 journals and Citescore was not available for 6 journals.
